# Supplementary material for: Mammalian keratin associated proteins (KRTAPs) subgenomes: disentangling hair diversity and adaptation to terrestrial and aquatic environments
Source: PubMed Central journal article supplement (PMC4180150; doi:10.1186/1471-2164-15-779), 2014-09-10

Figure 1

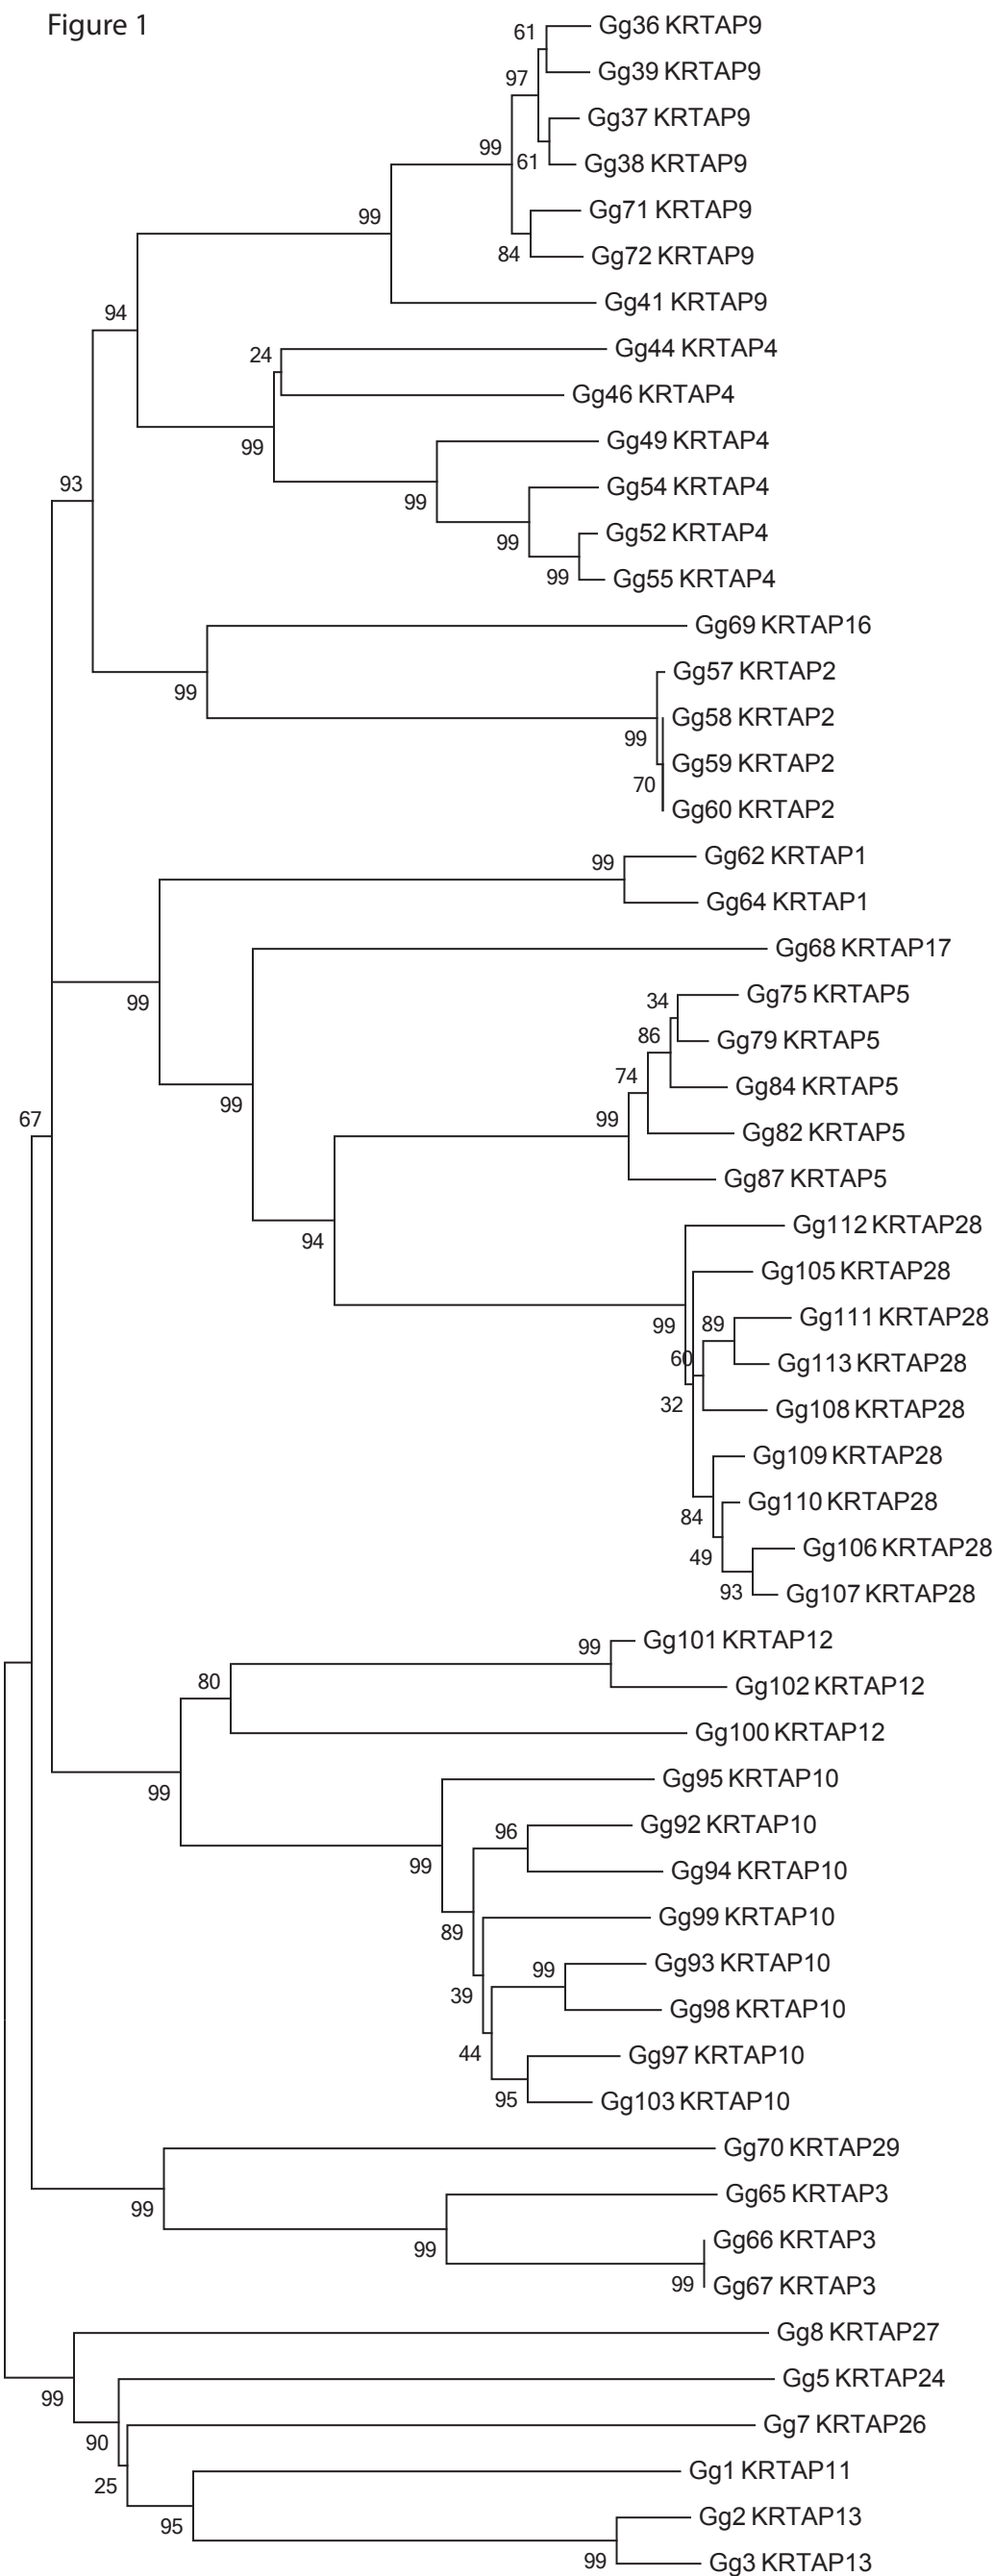

0.1

Figure 2

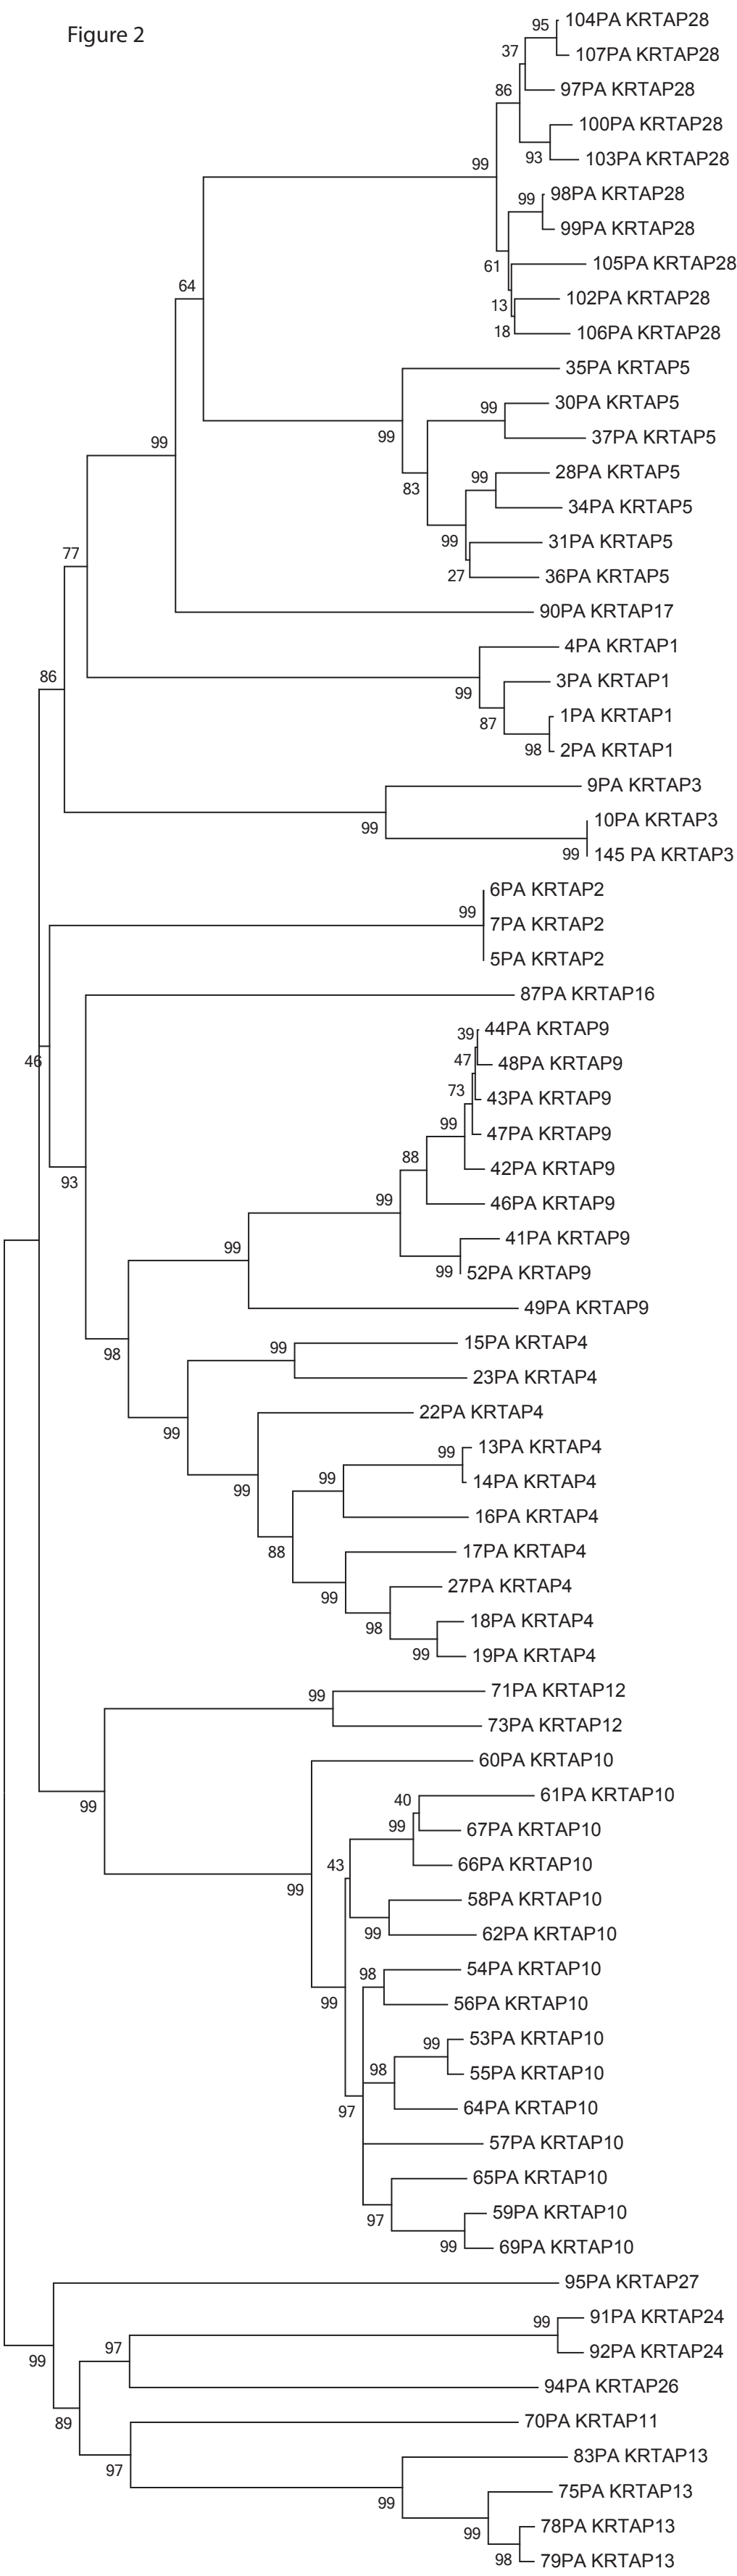

Figure 3

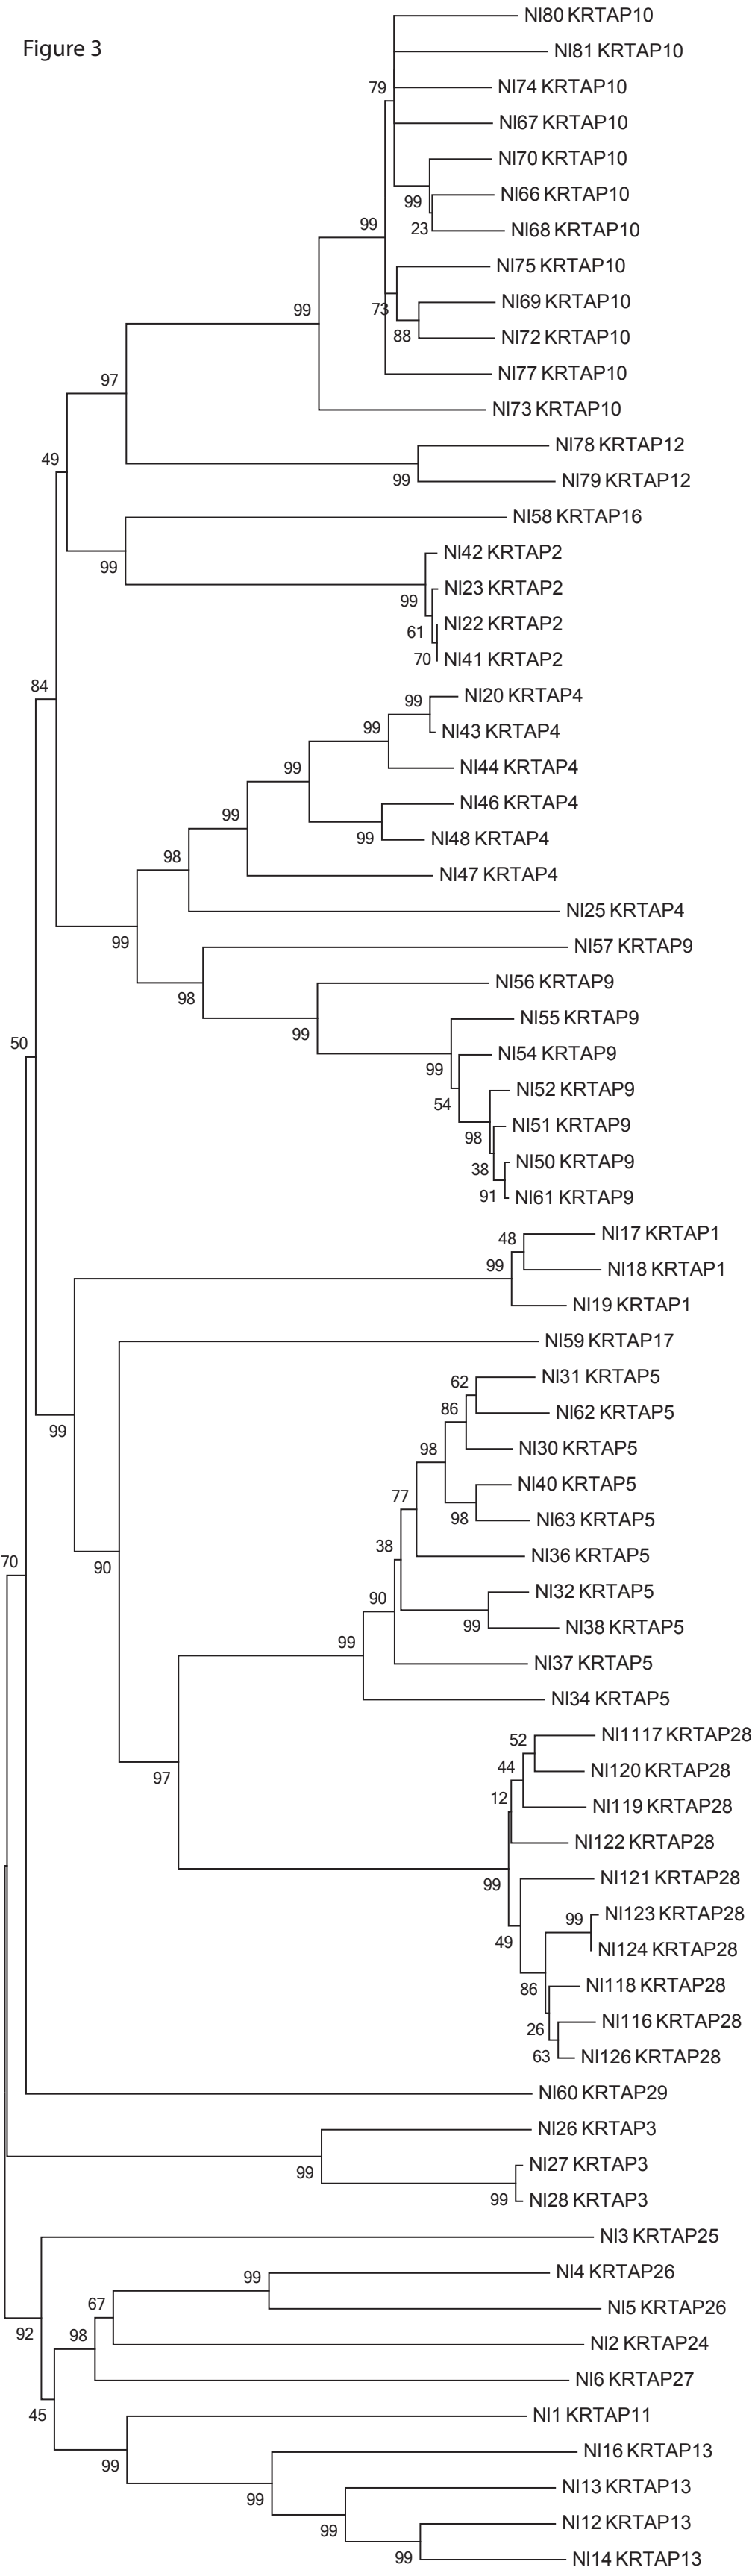

0.1

Figure 4

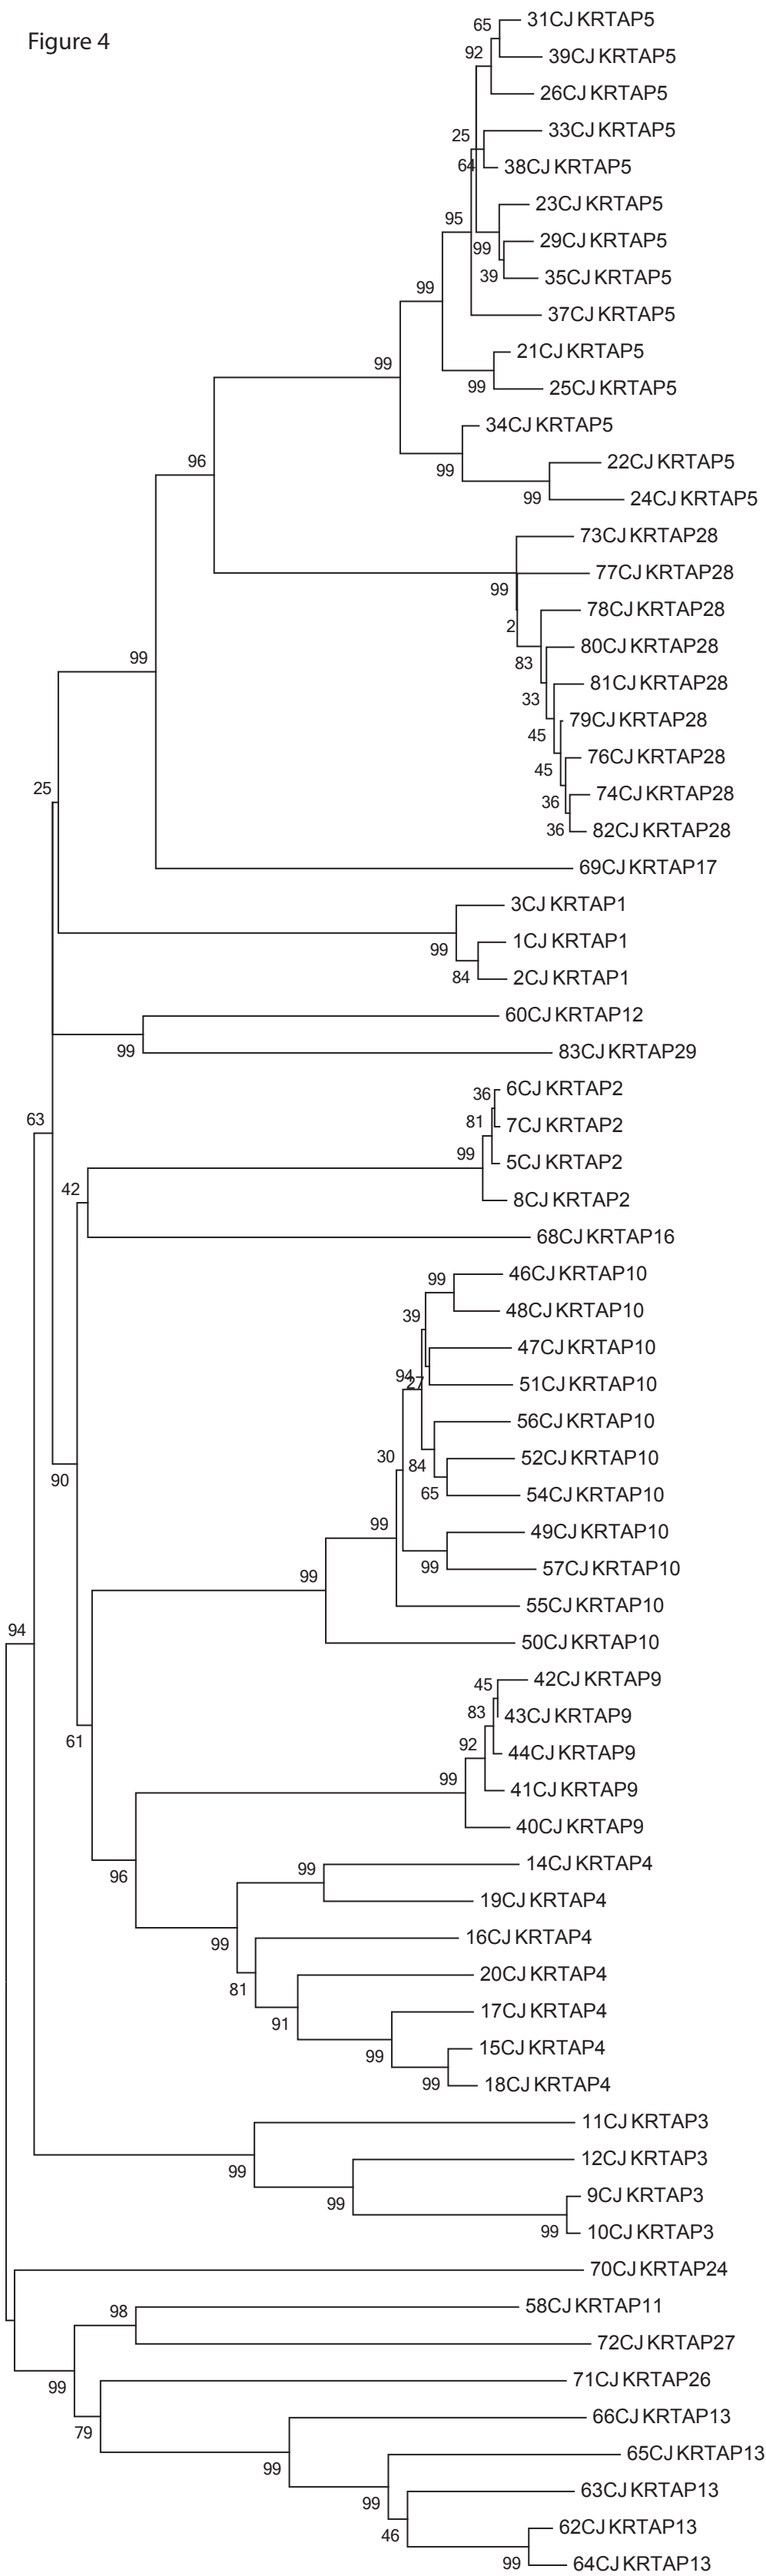

0.1

Figure 5

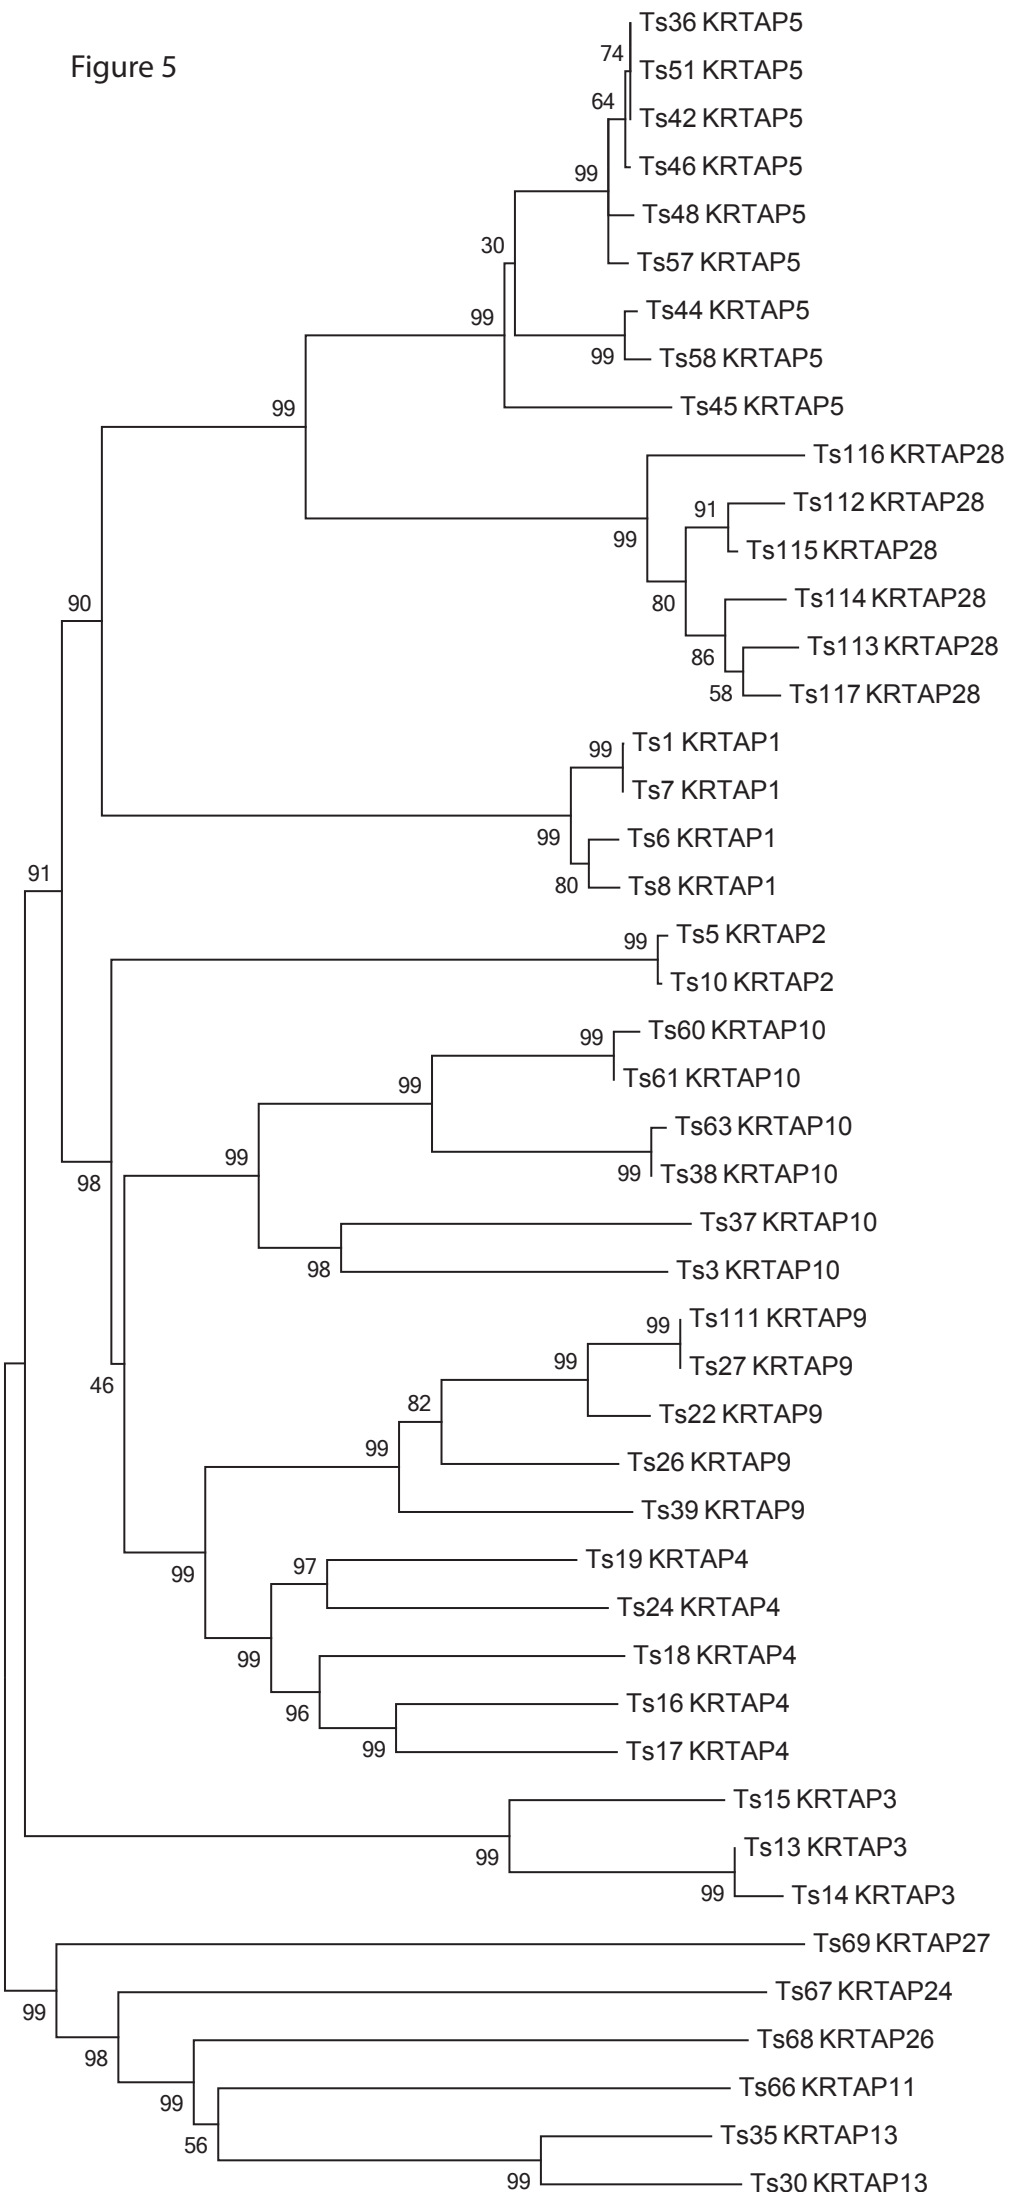

0.1

Figure 6

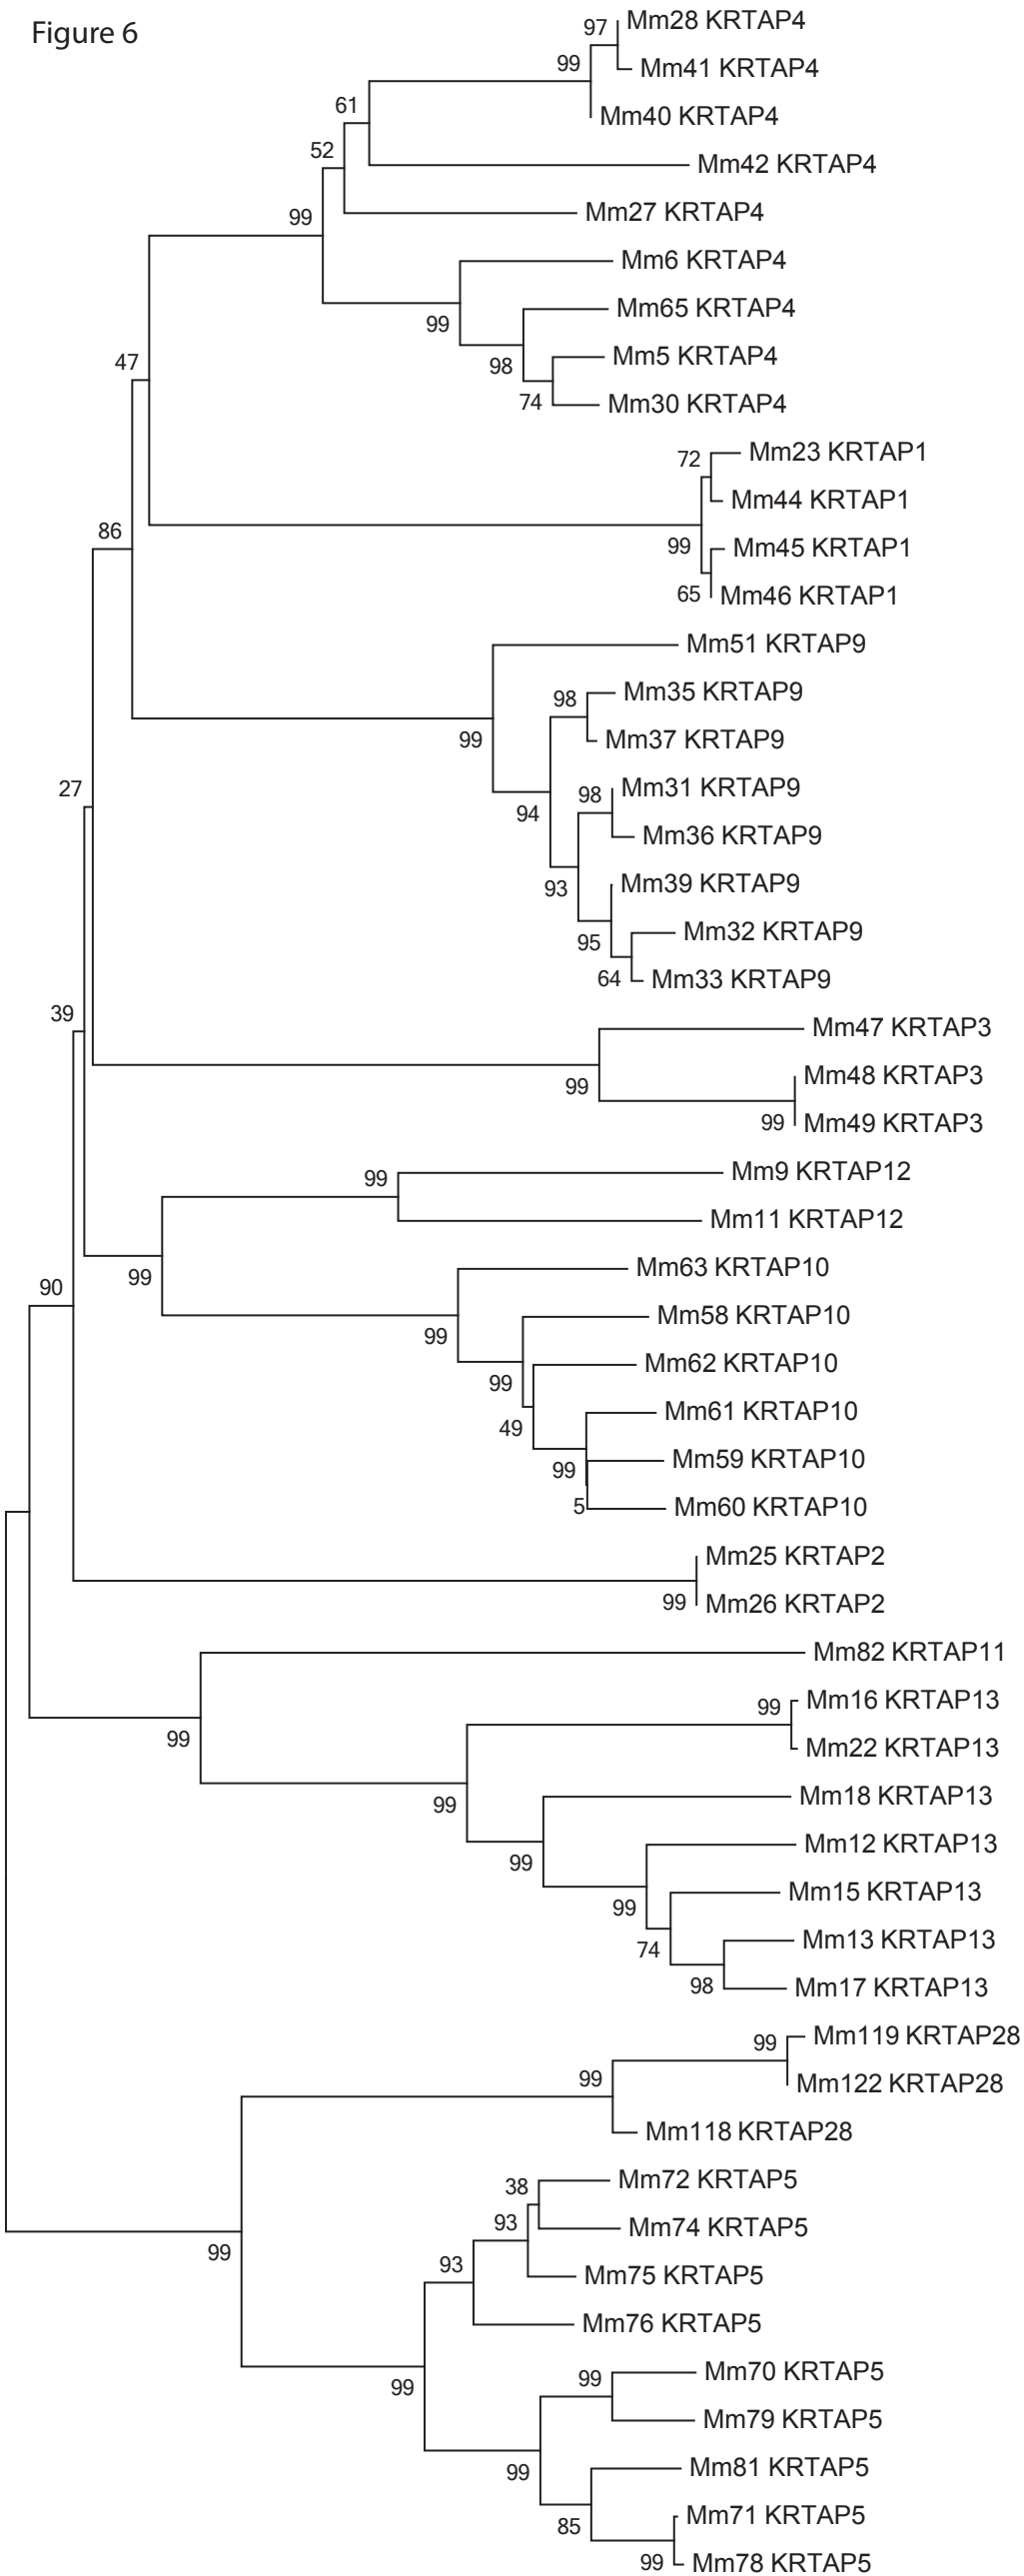

0.1

Figure 7

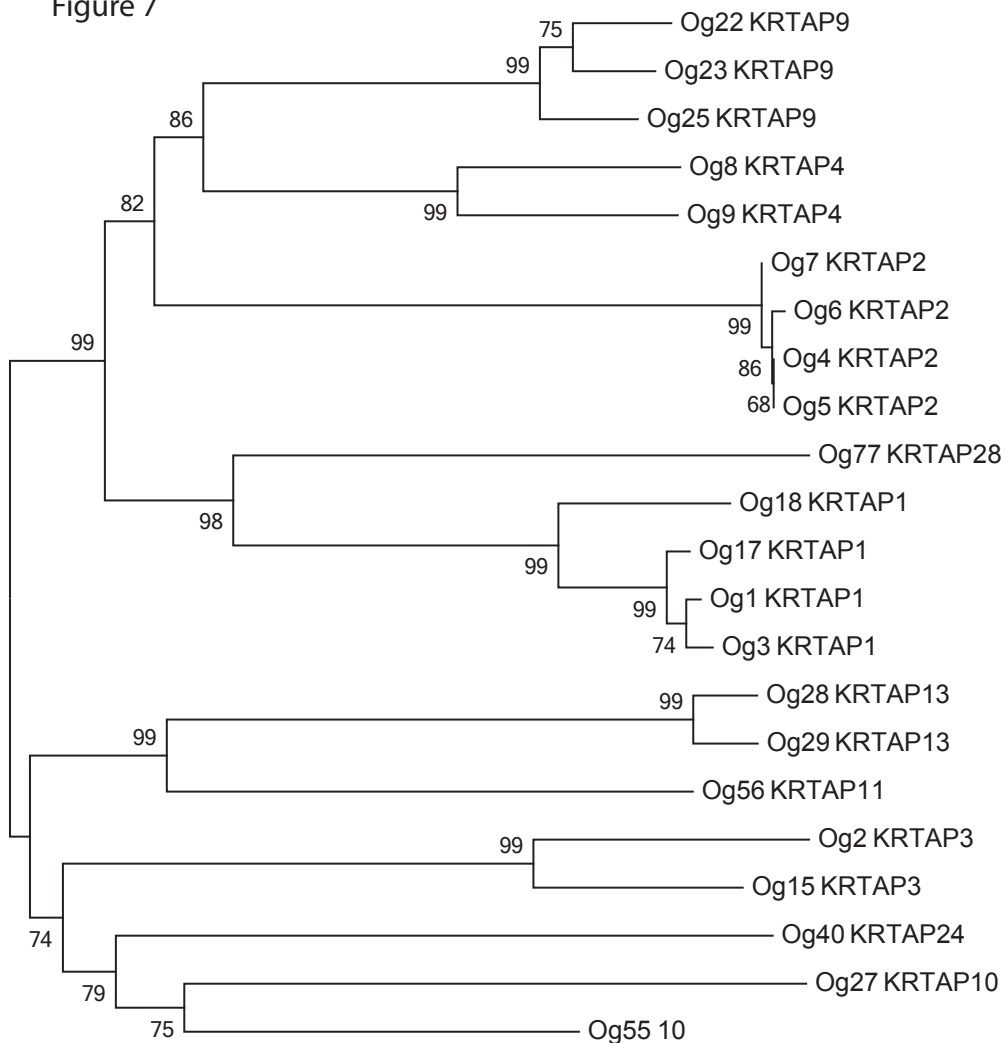

0.1

Figure 8

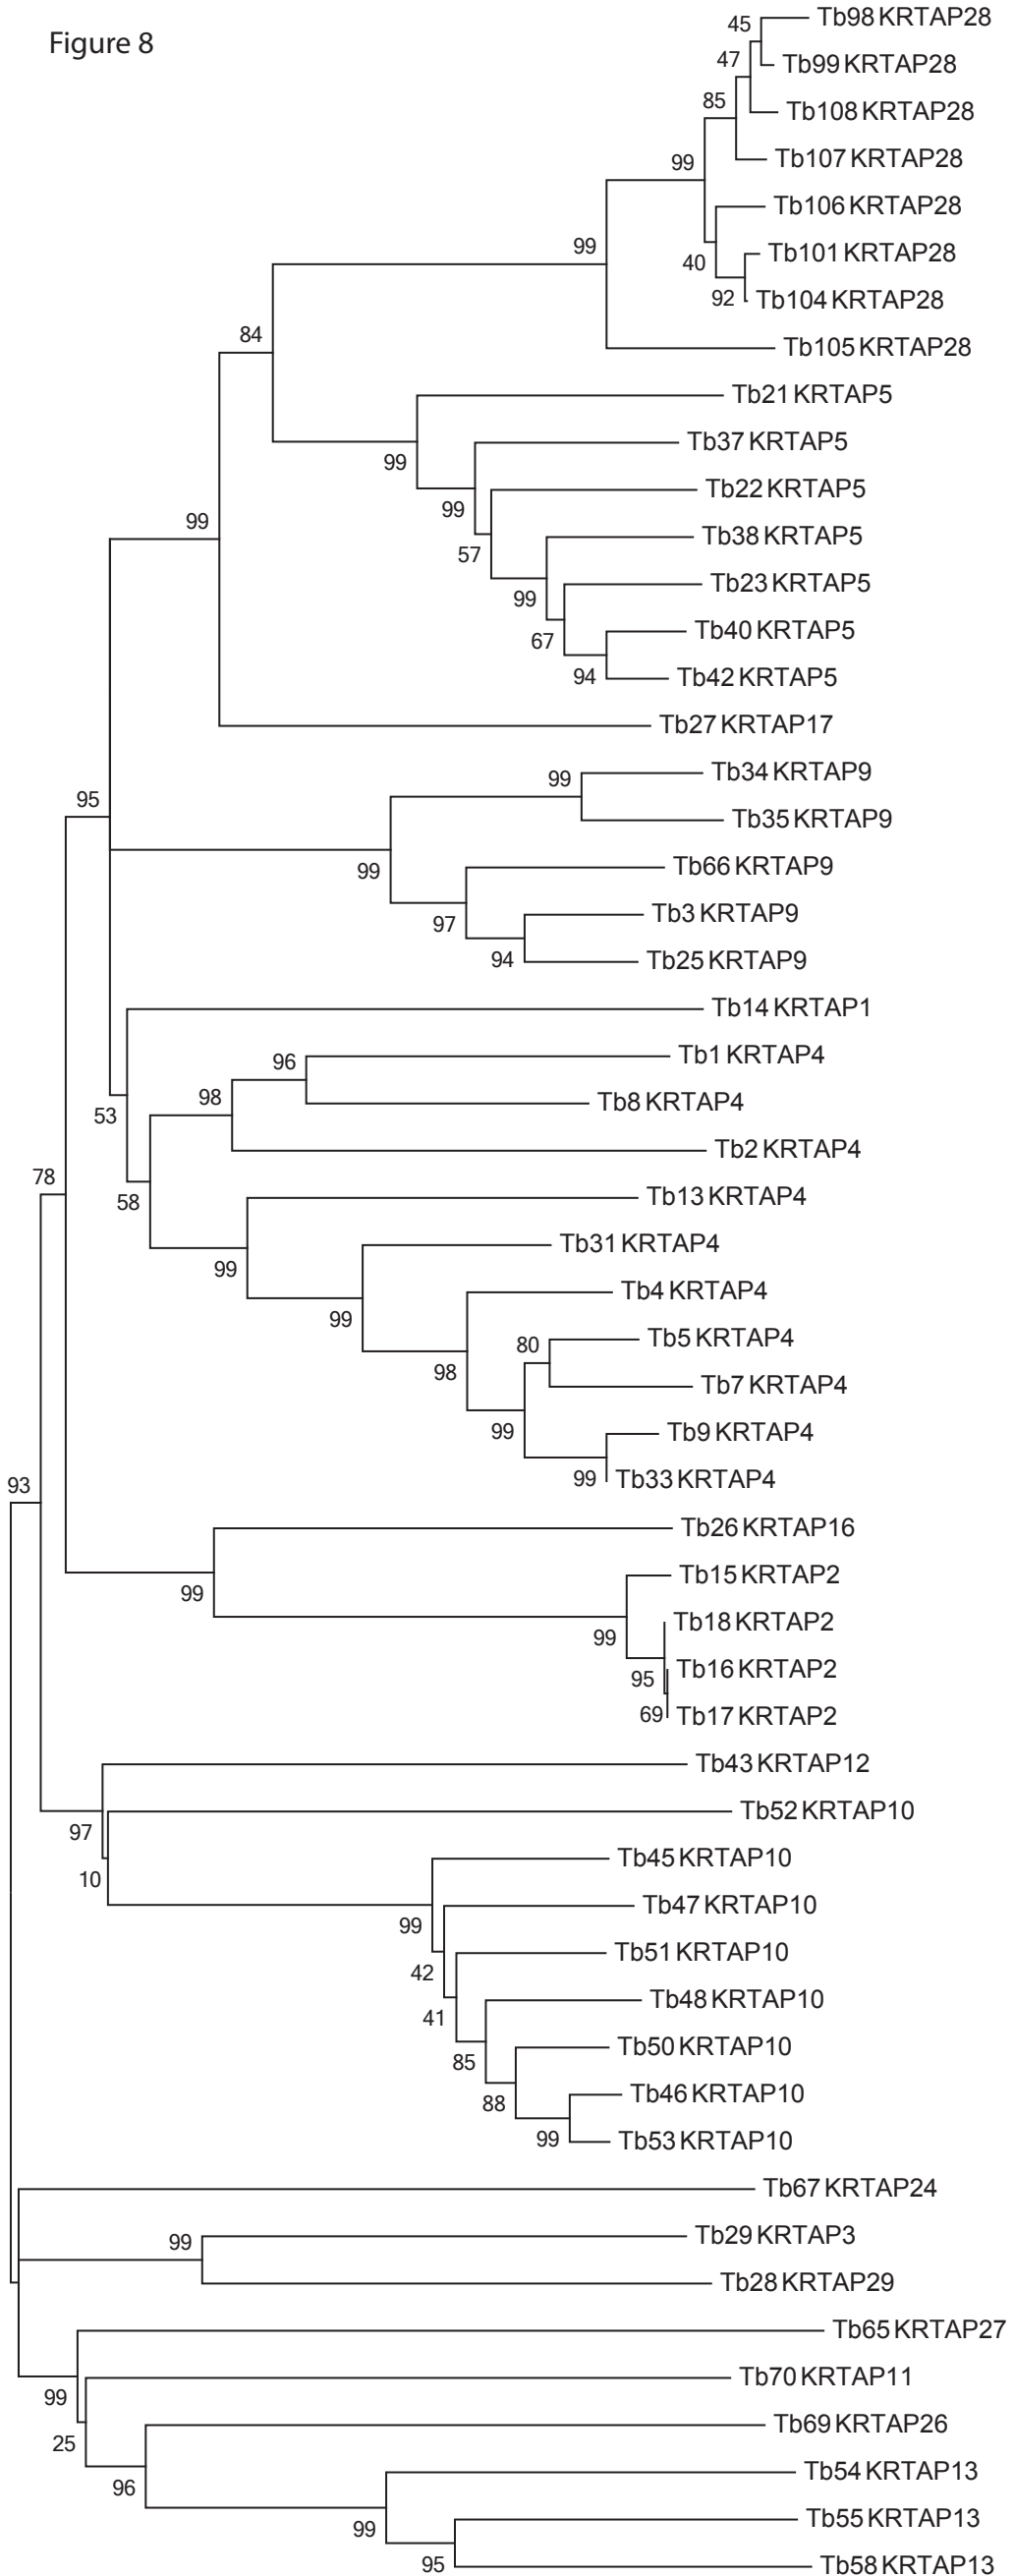

0.1



Figure 9

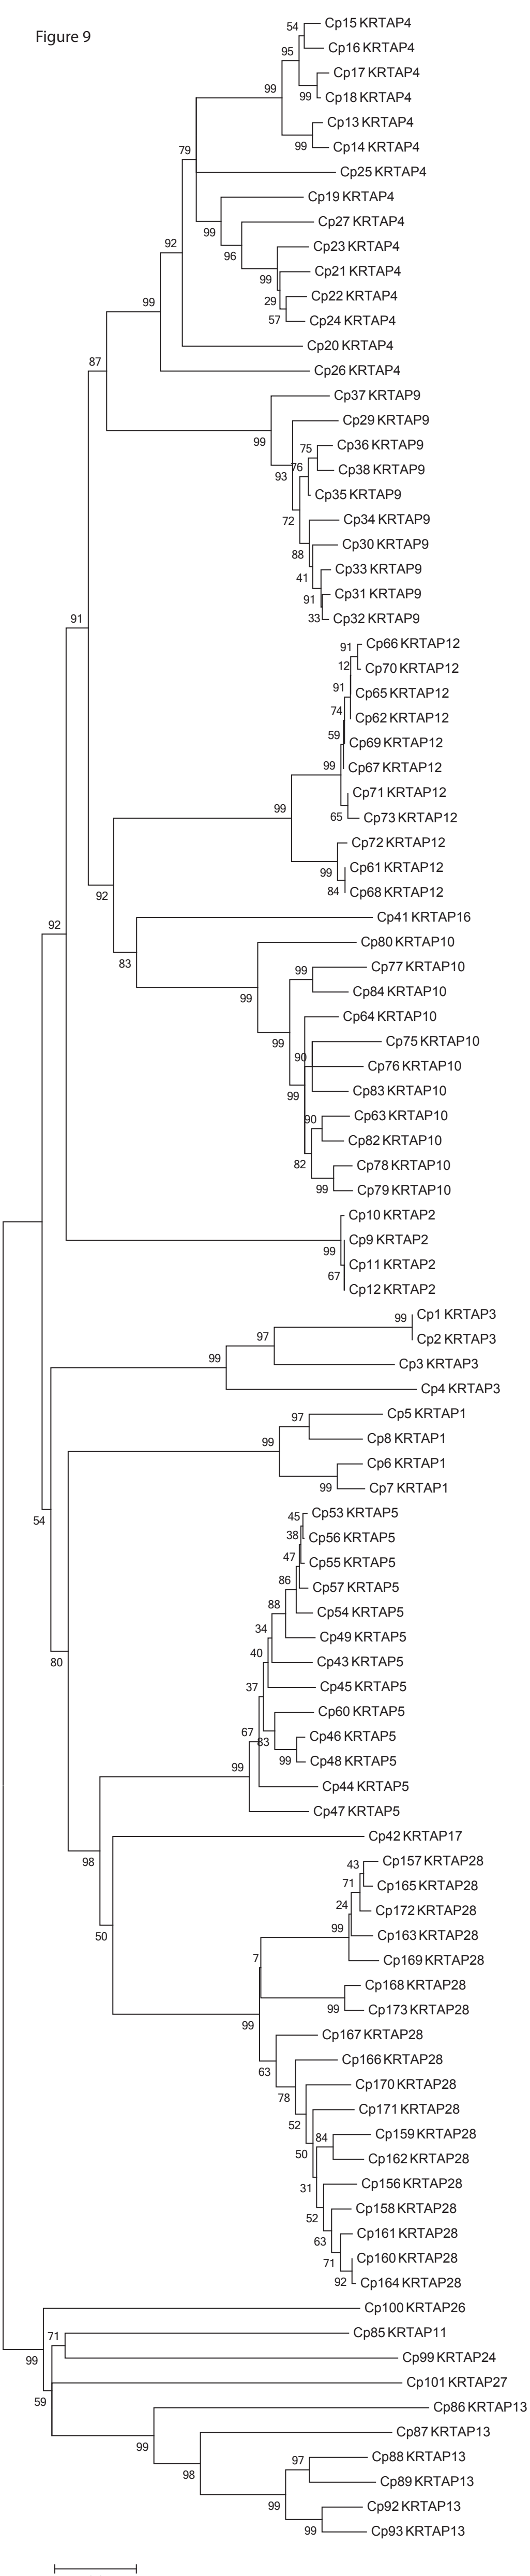

Figure 10

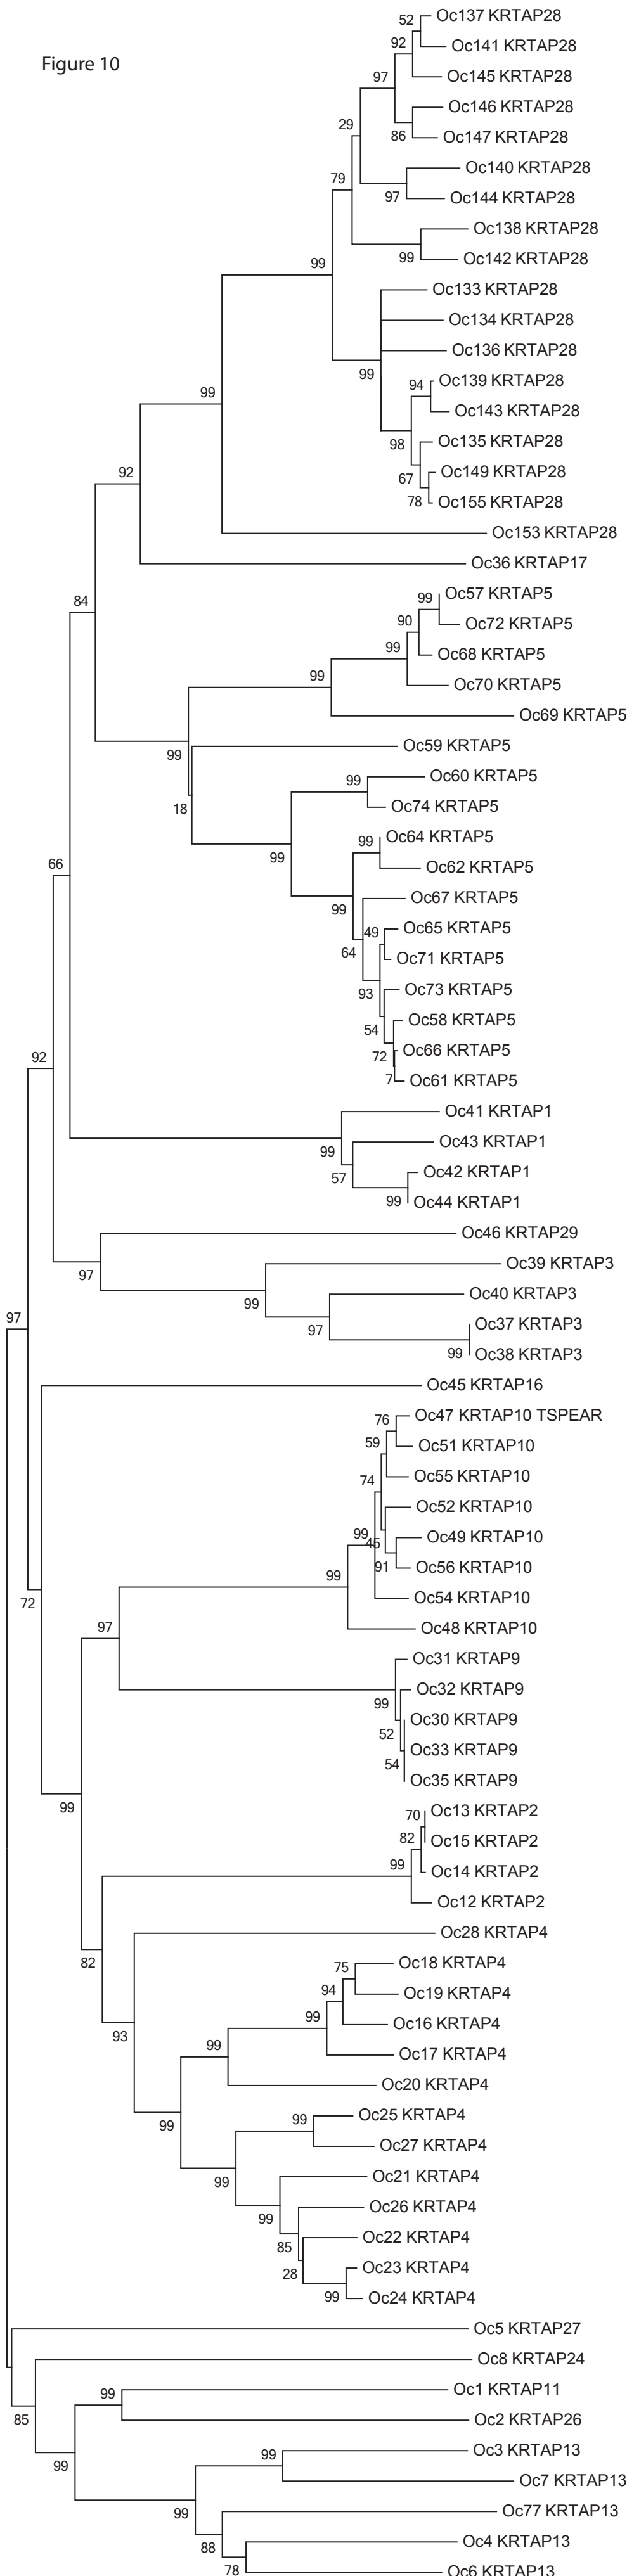

0.1

Figure 11

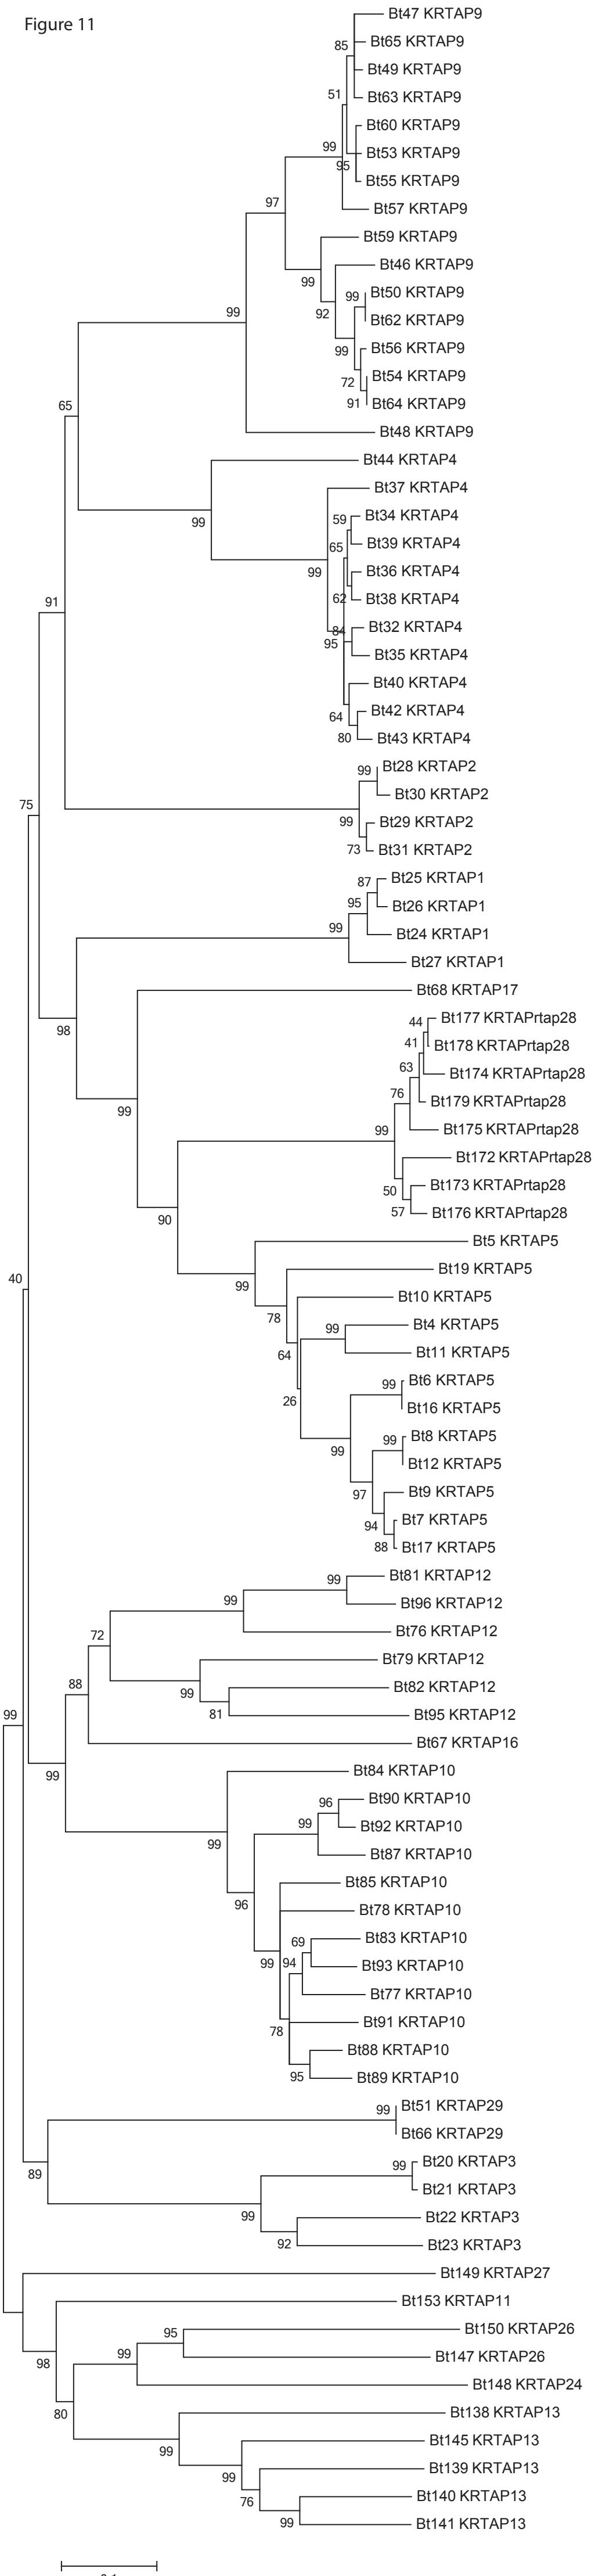

0.1

Figure 12

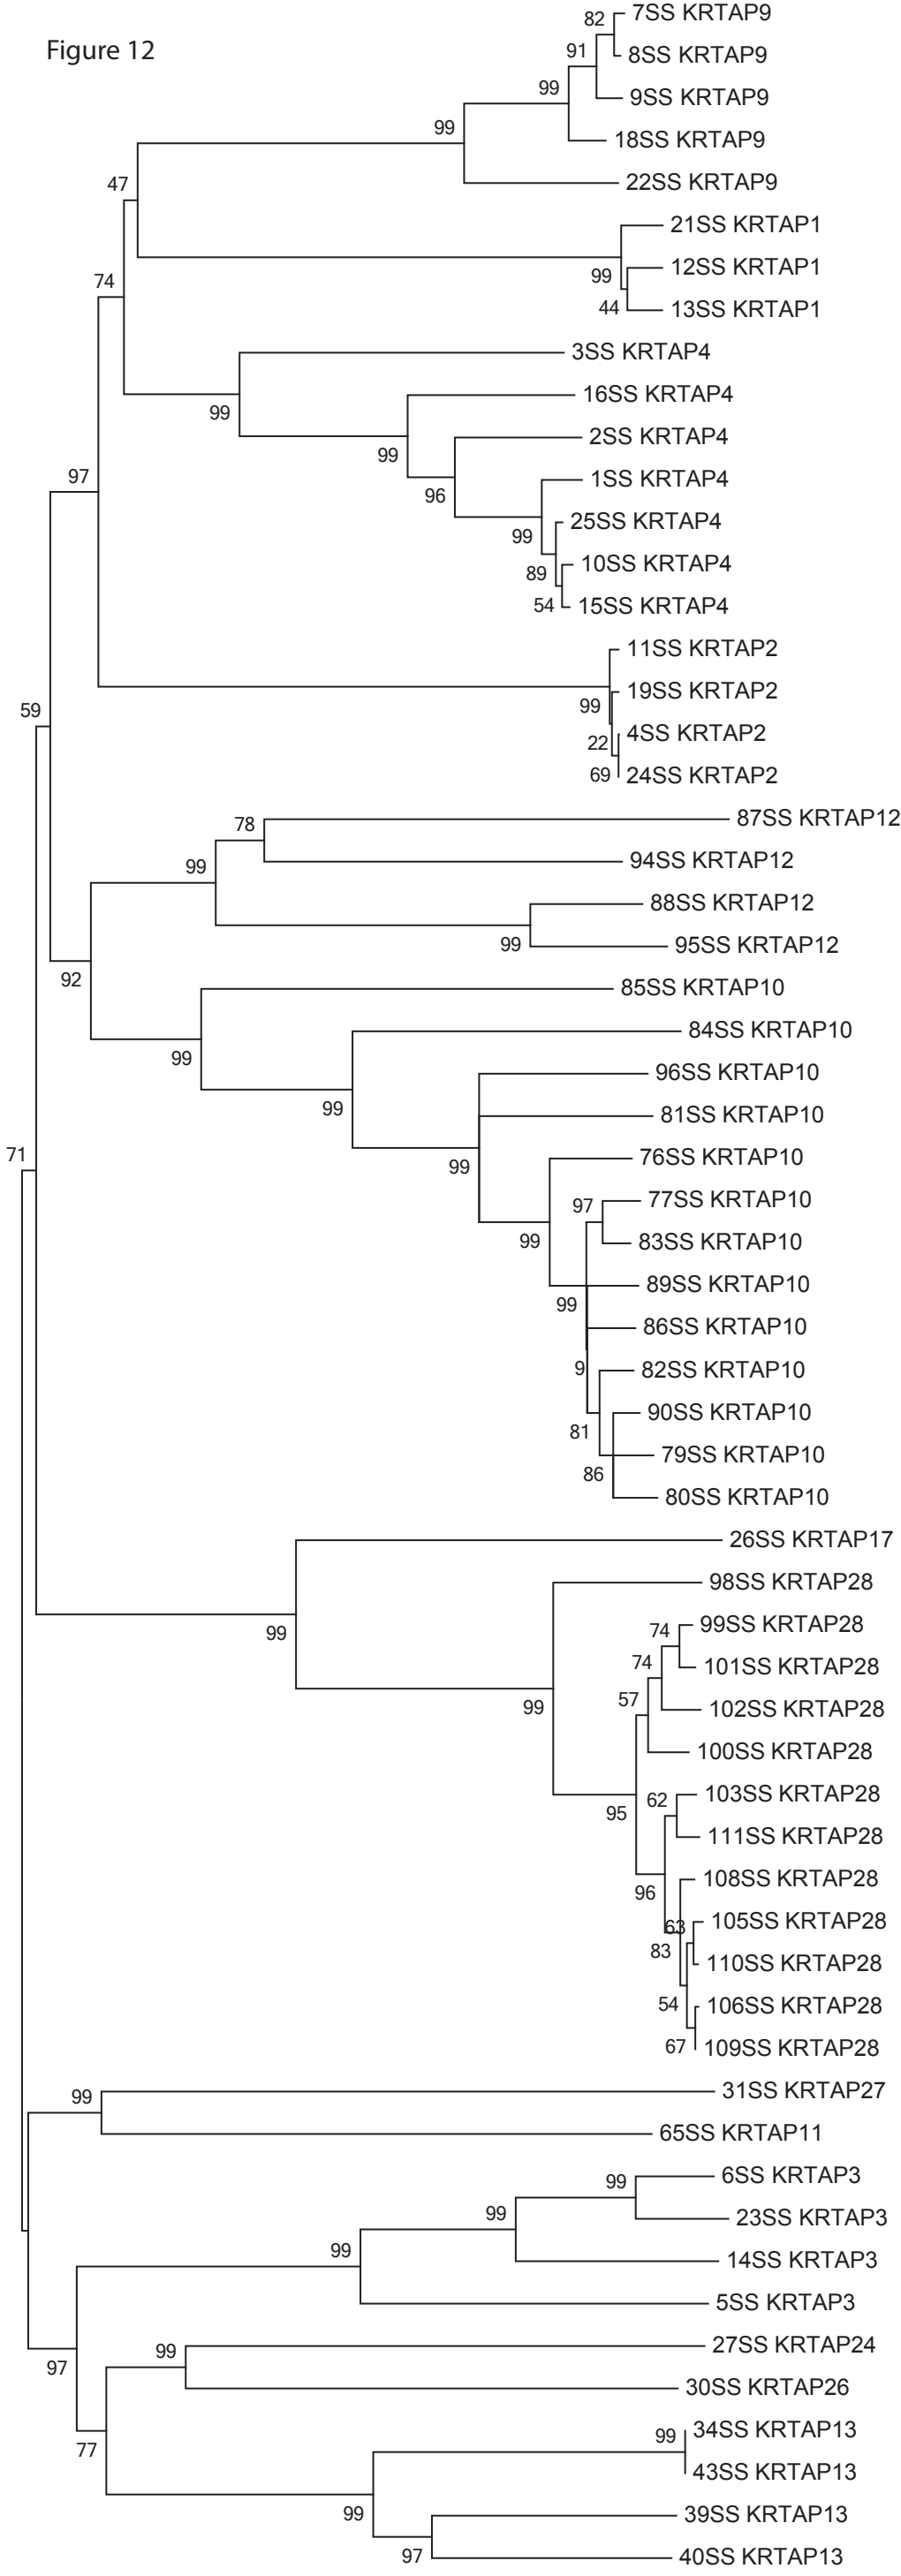

0.1

Figure 13

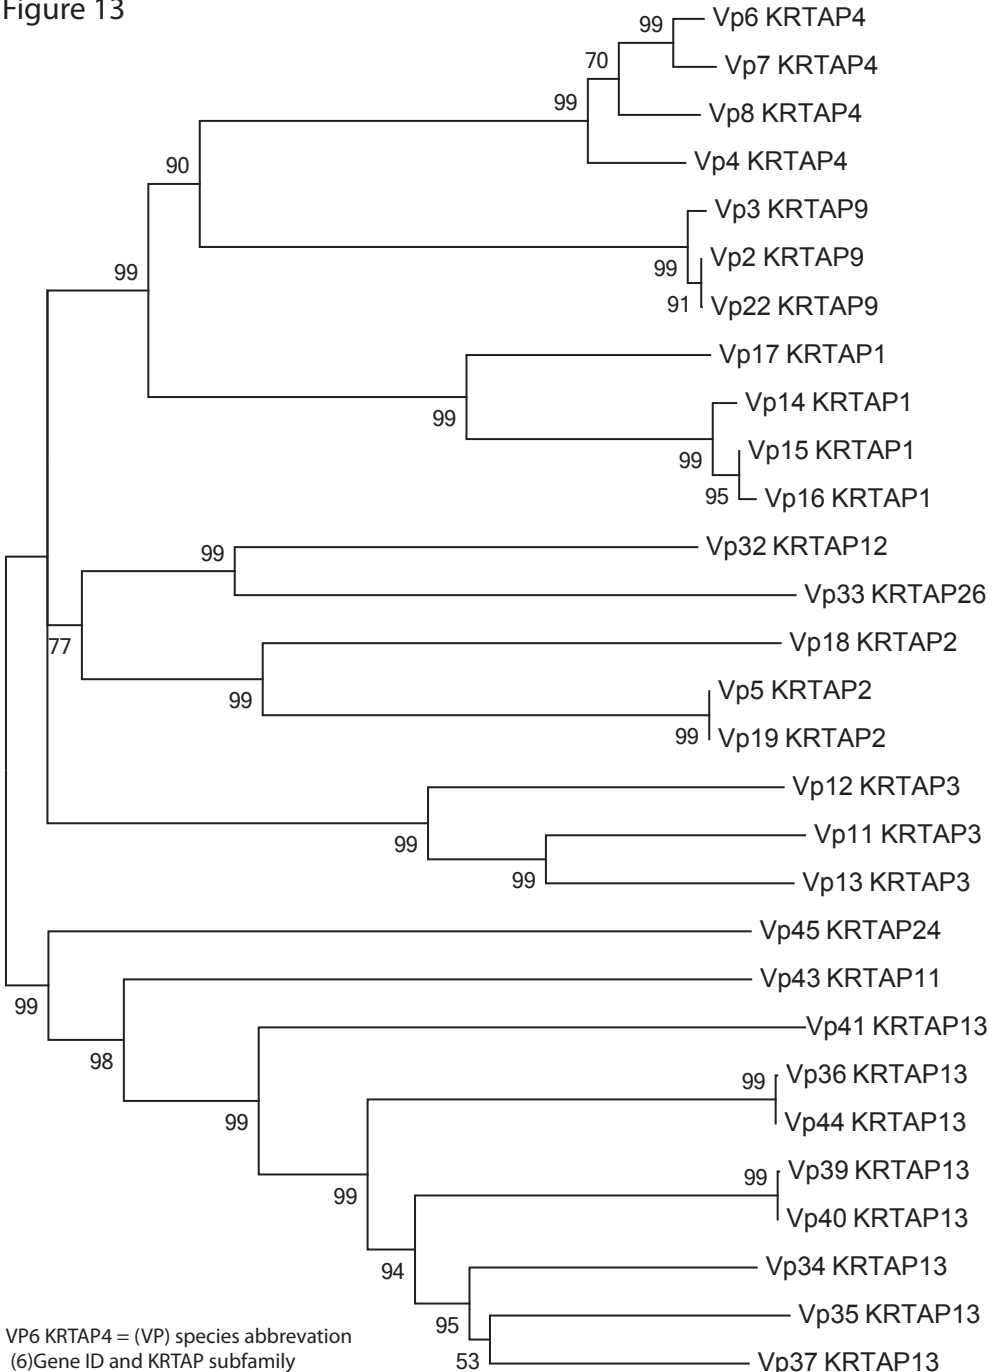

VP6 KRTAP4 = (VP) species abbreviation  
(6)Gene ID and KRTAP subfamily

Figure 14

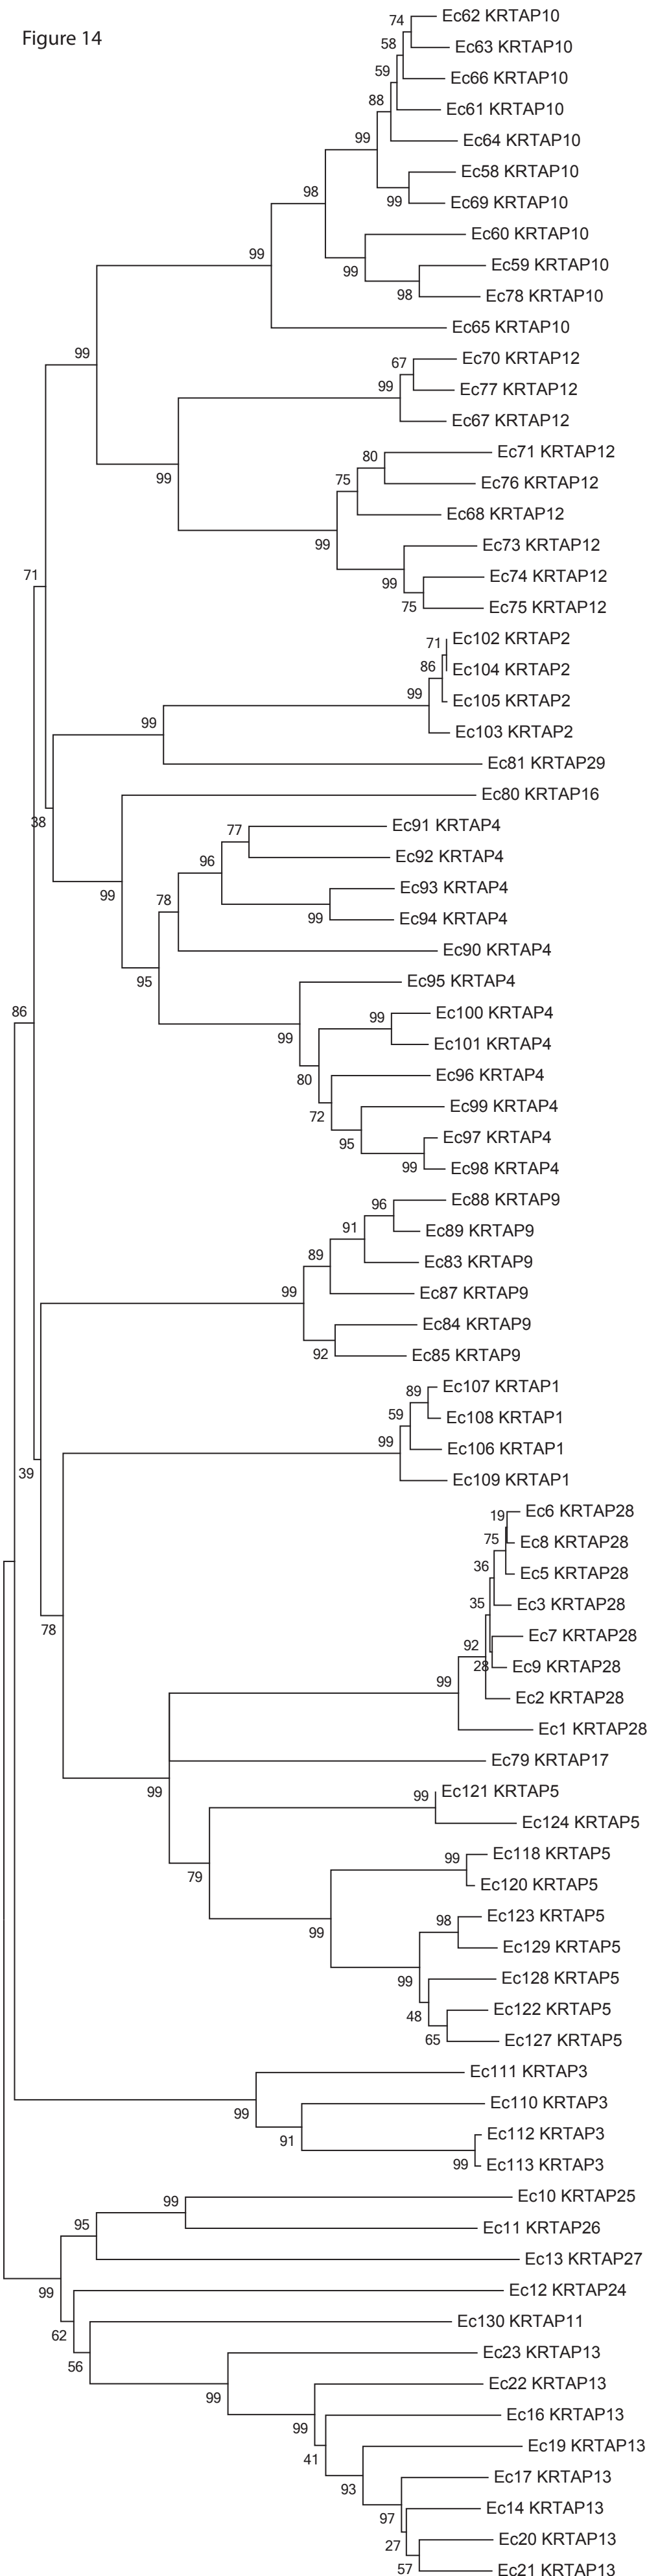

Figure 15

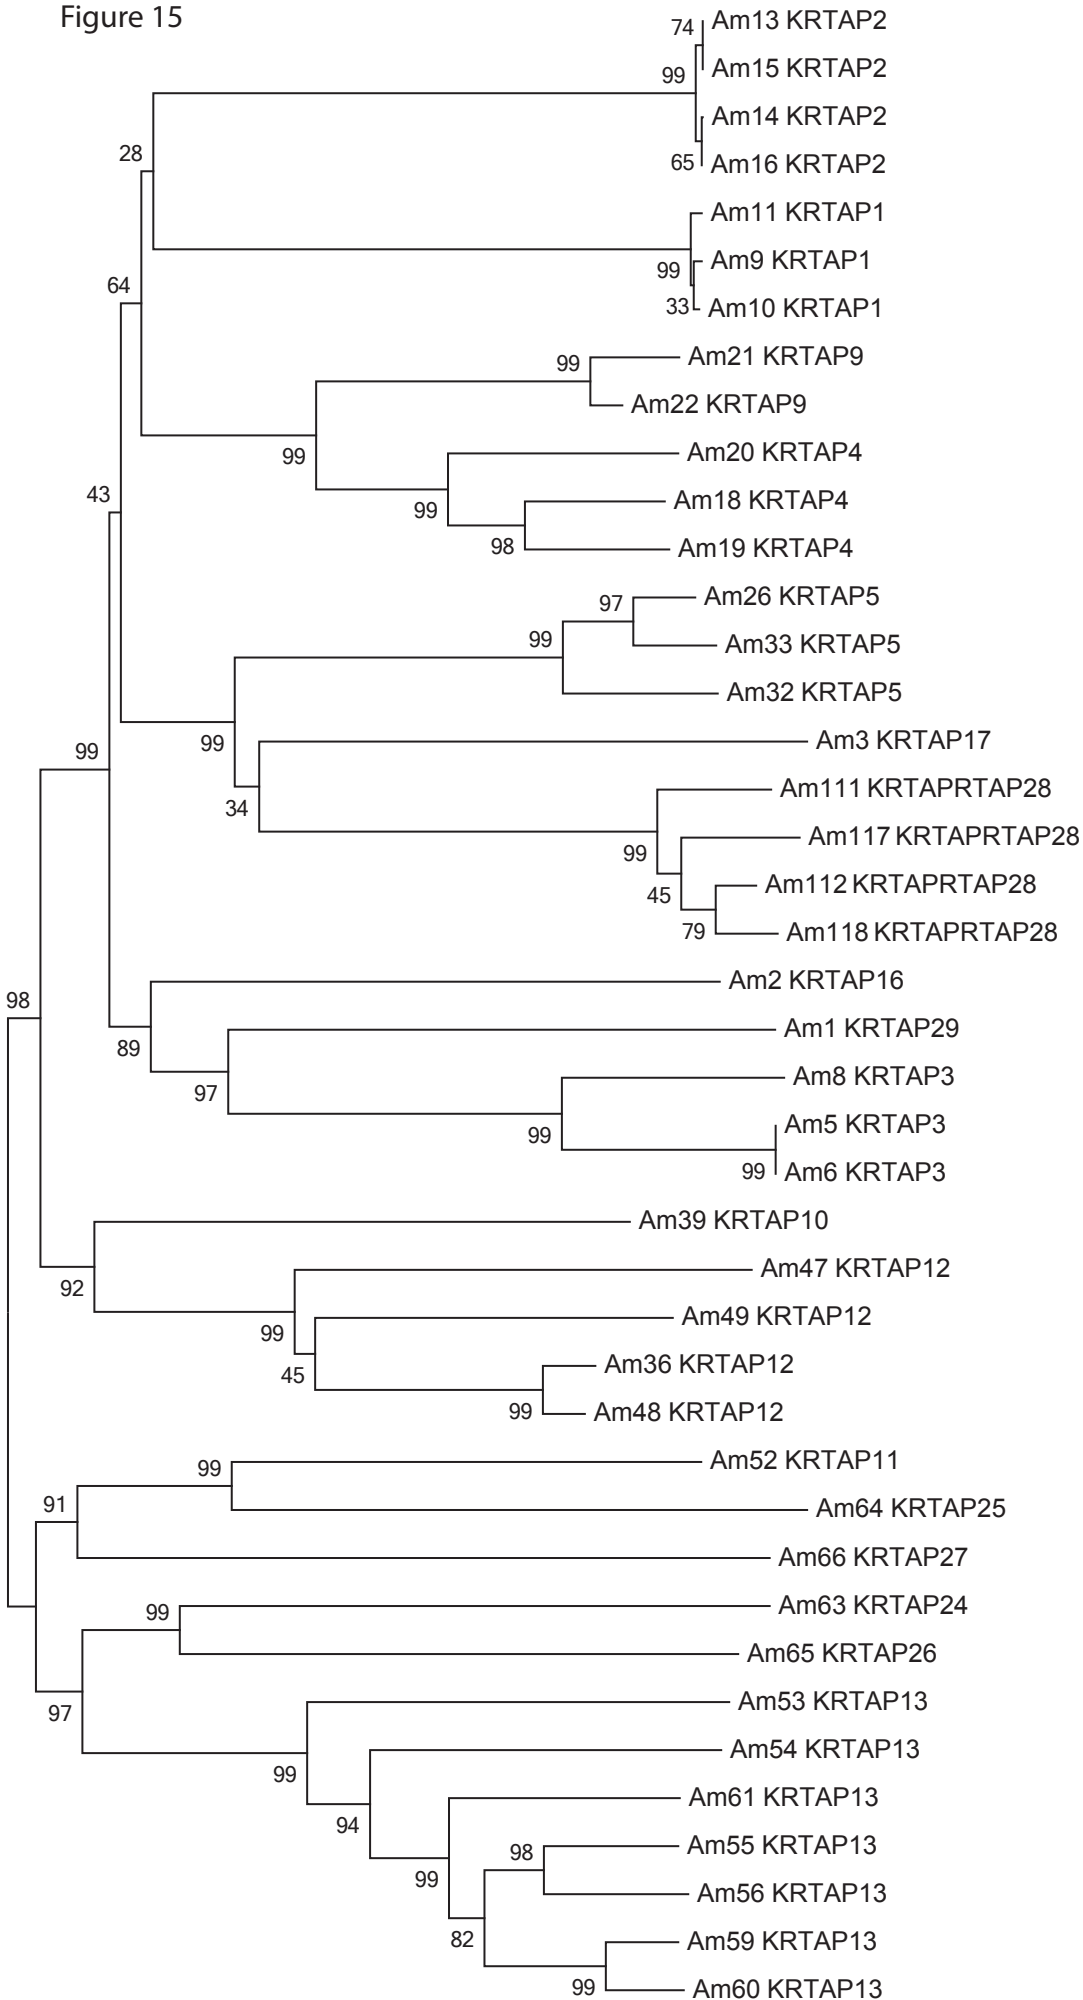

0.1

Figure 16

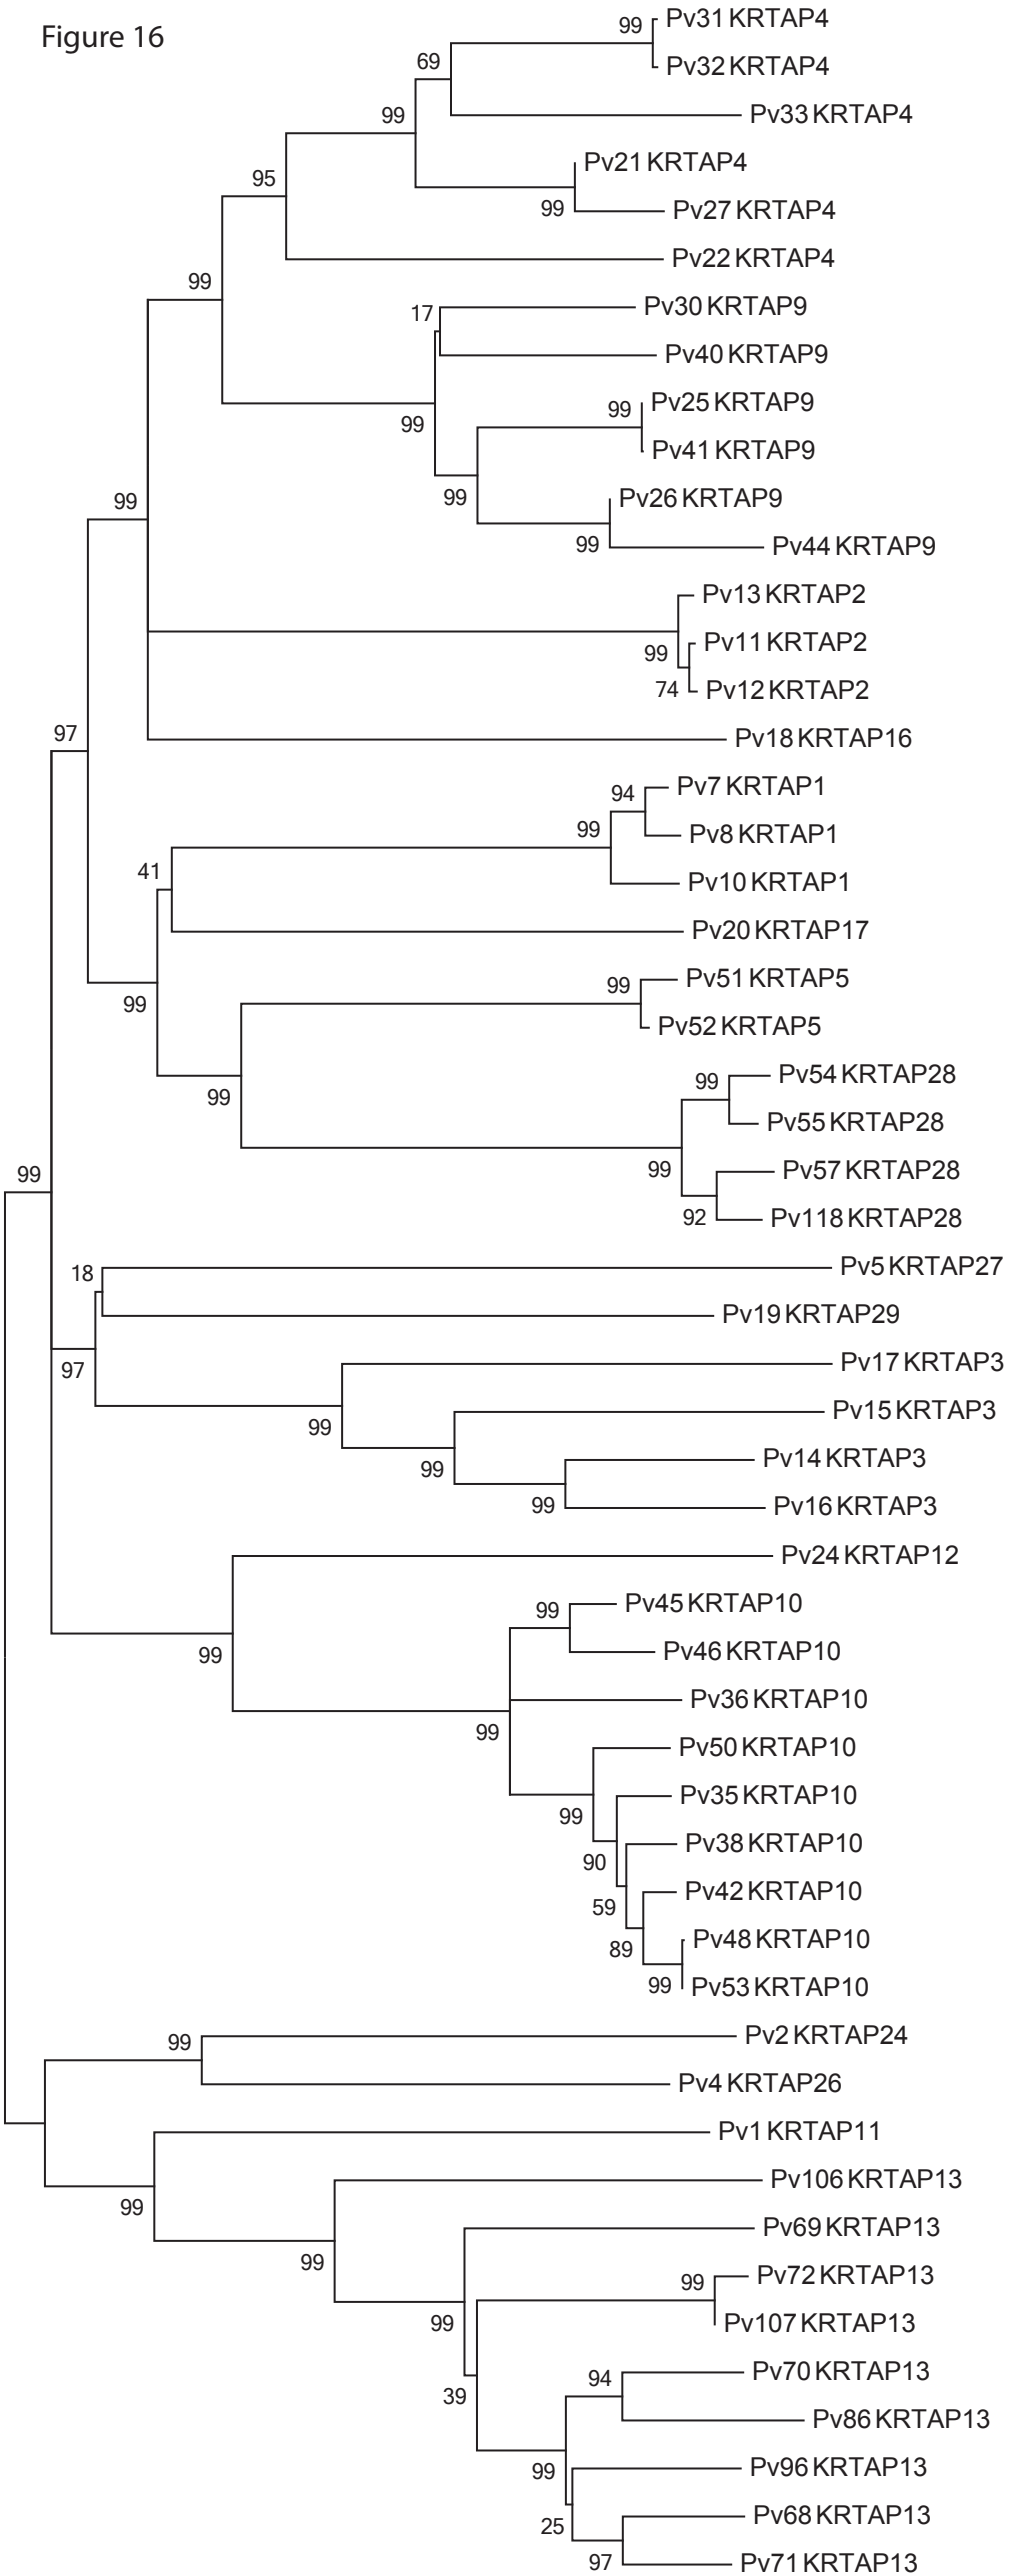

0.1



Figure 17

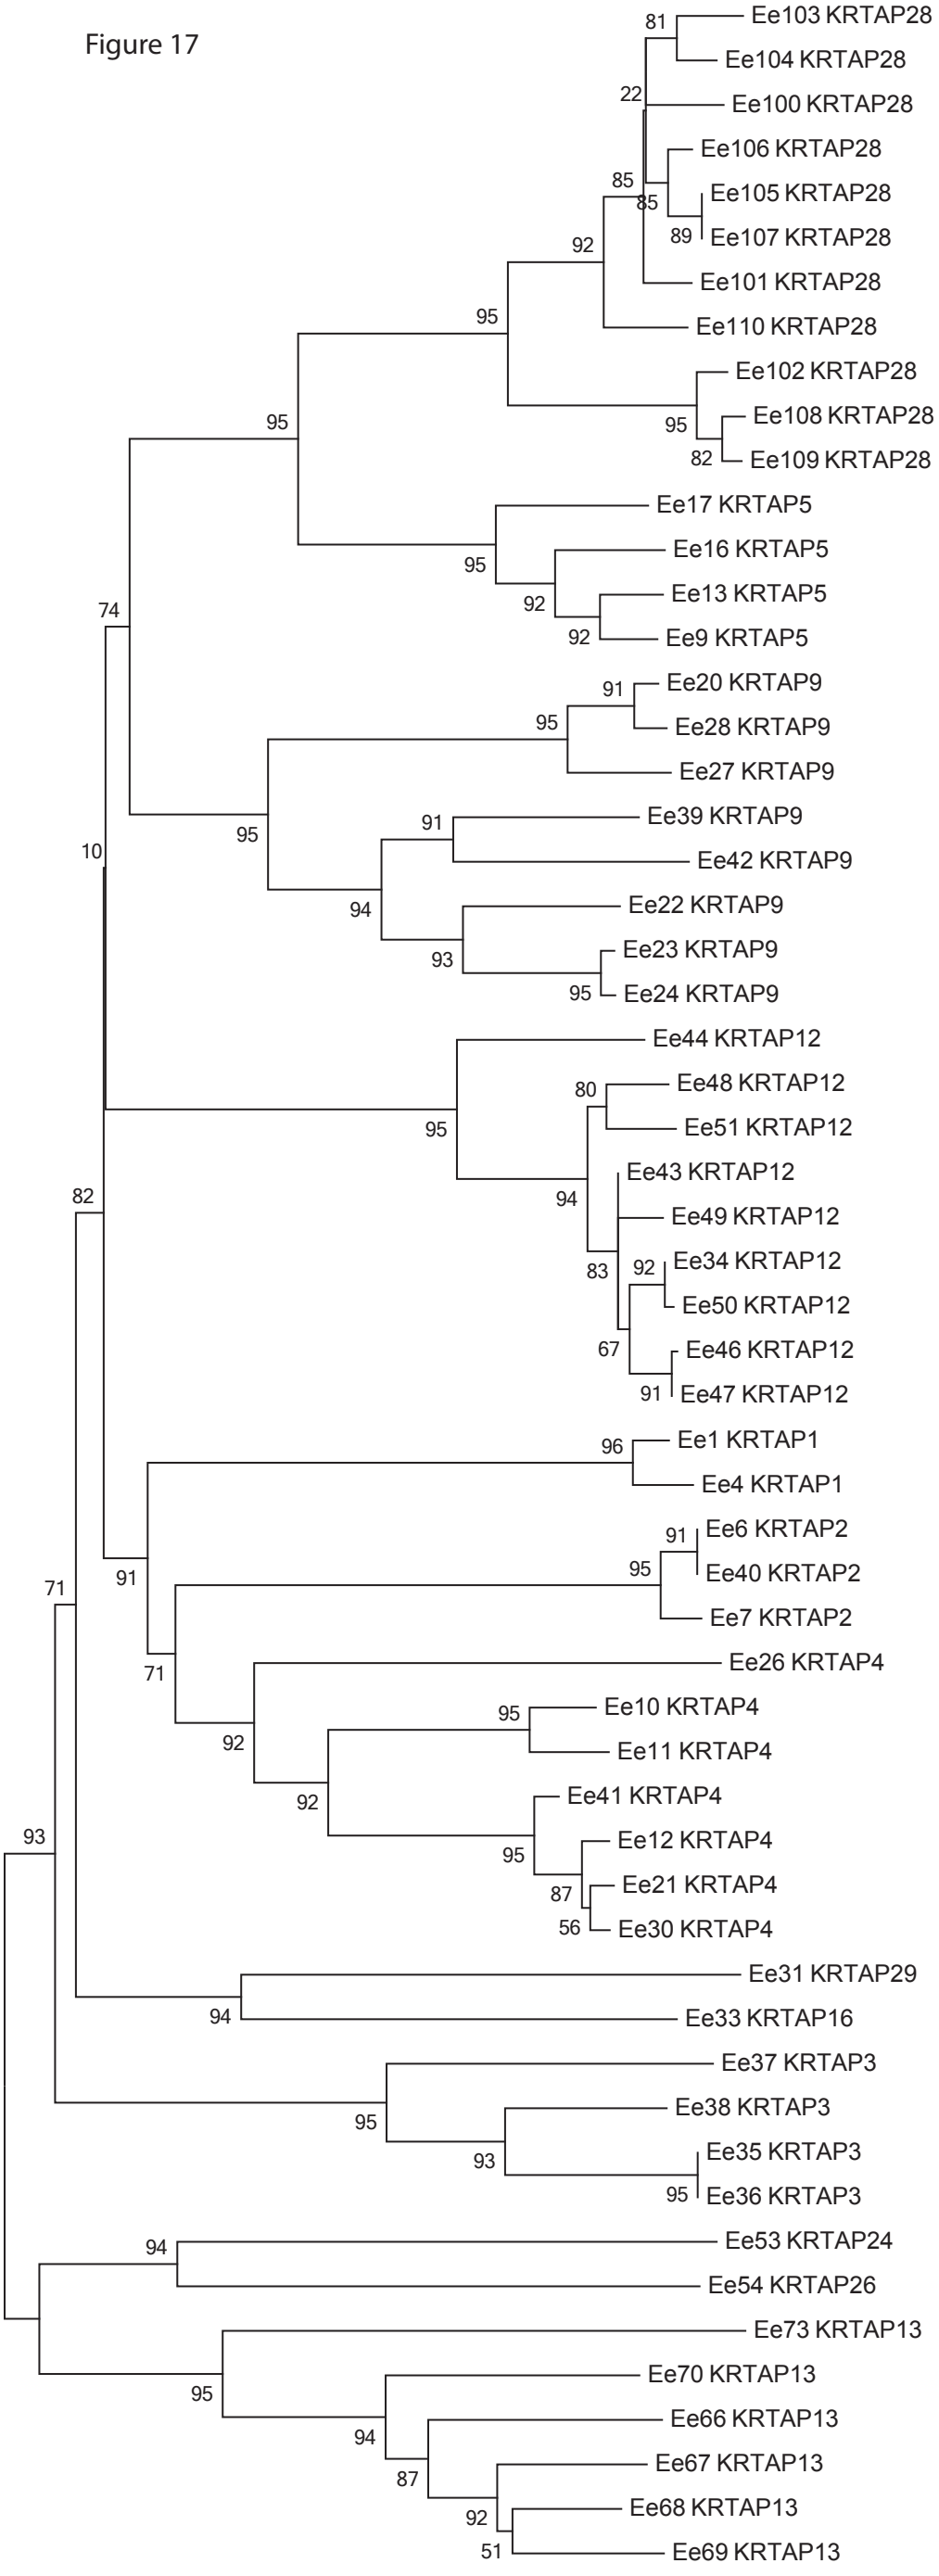

0.1

Figure 18

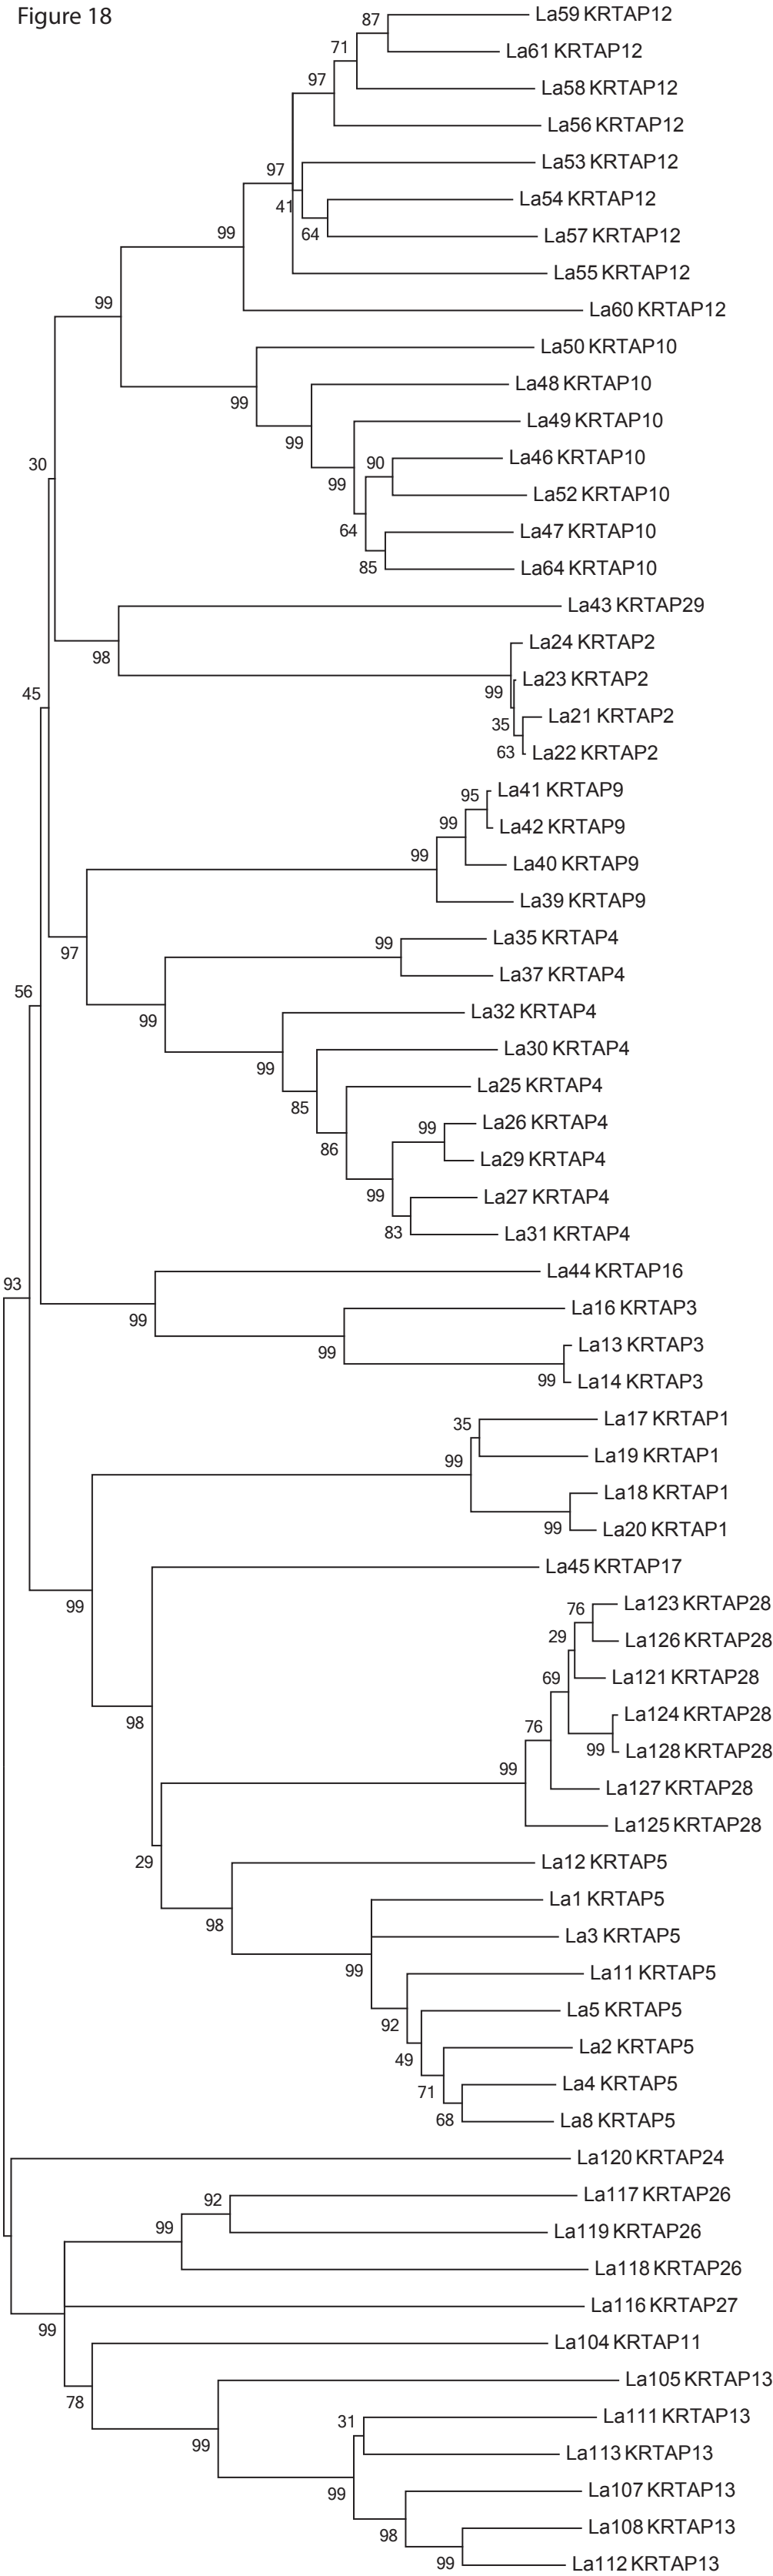

0.1

Figure 19

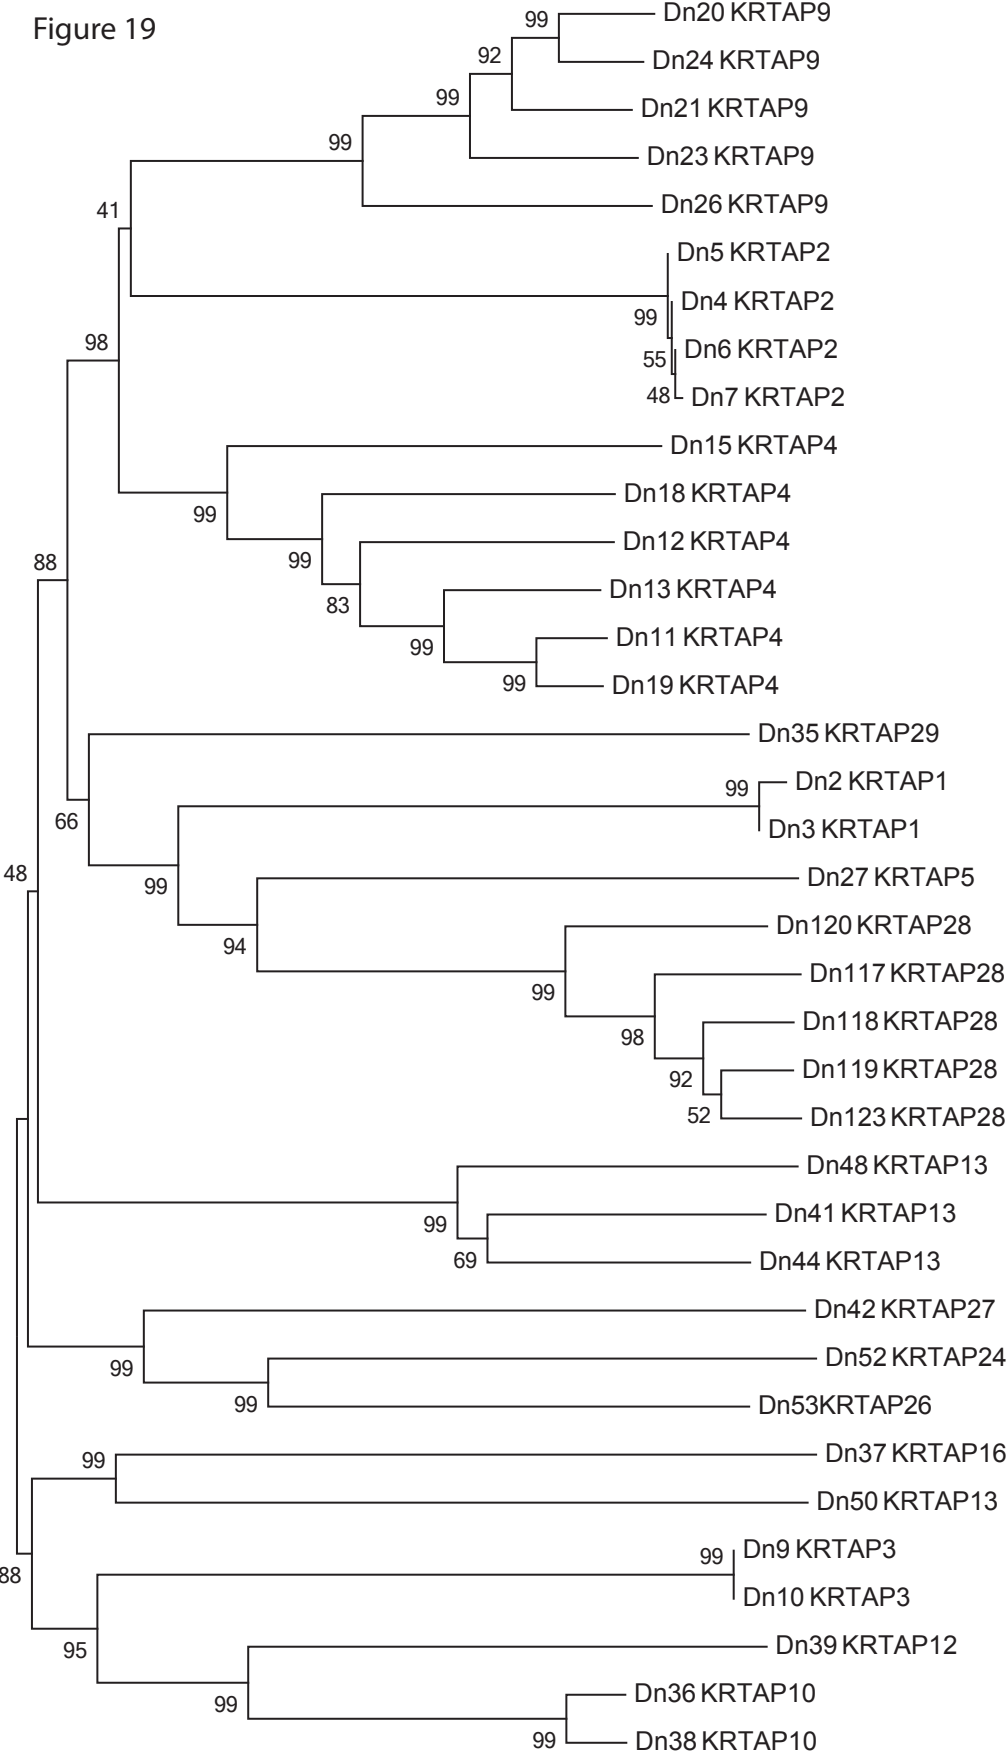

Figure 20

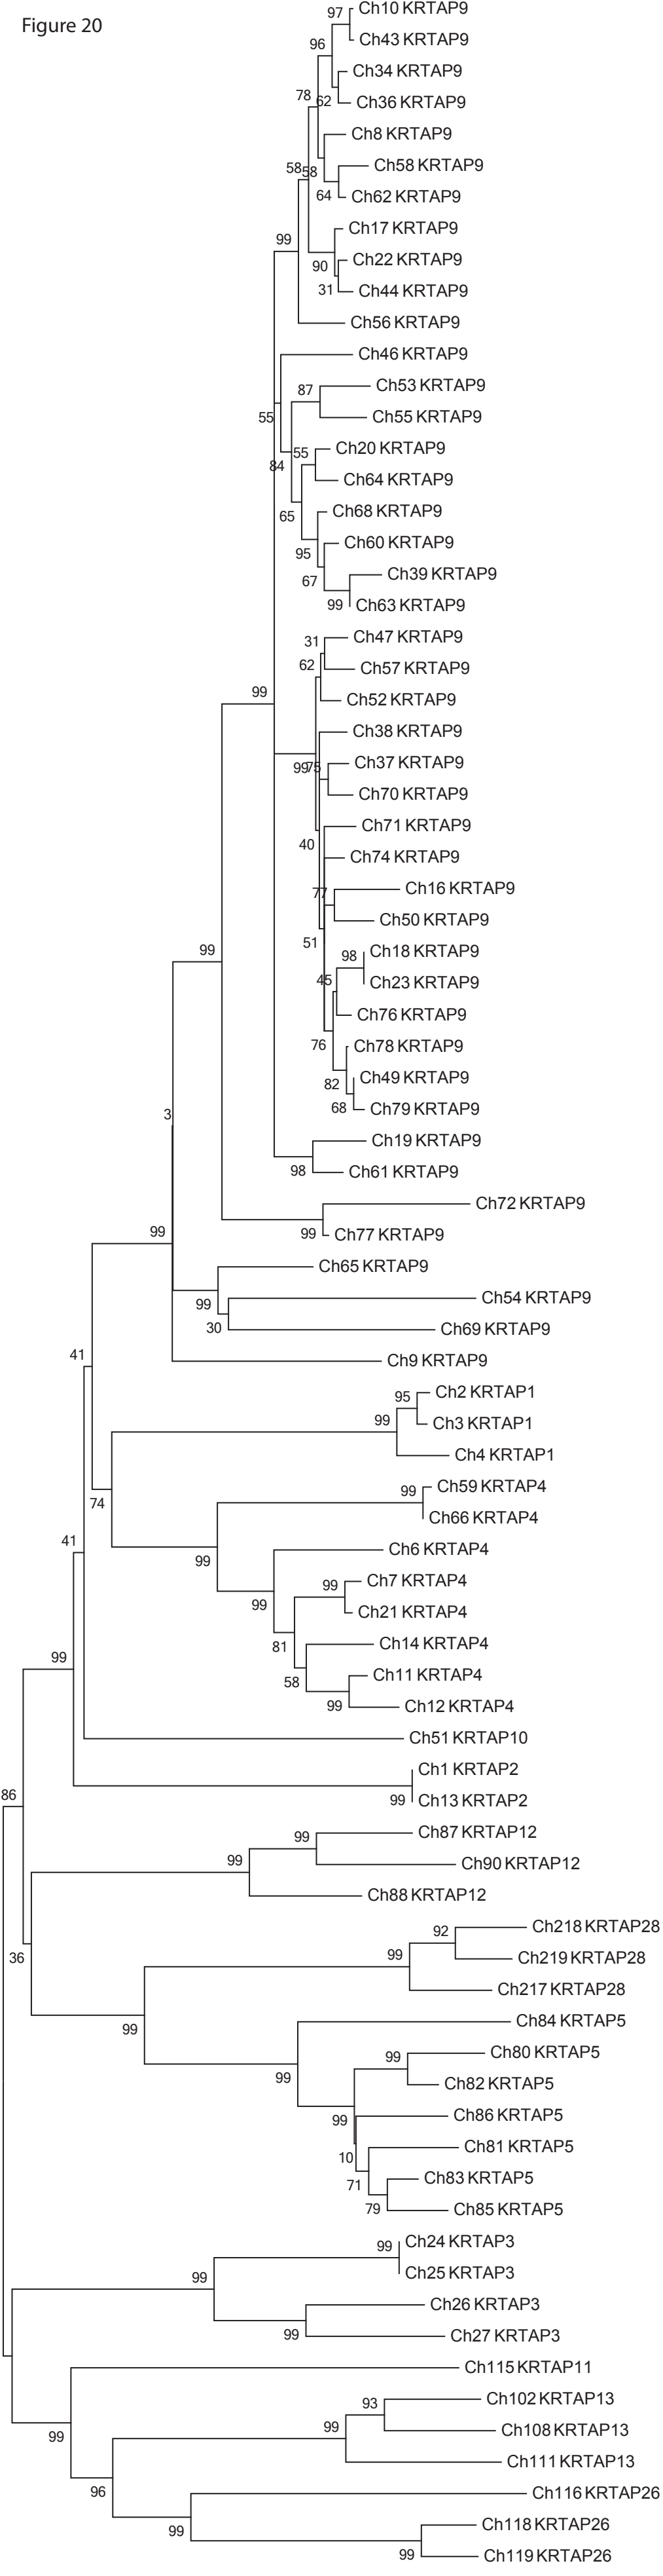

0.1

Figure 21

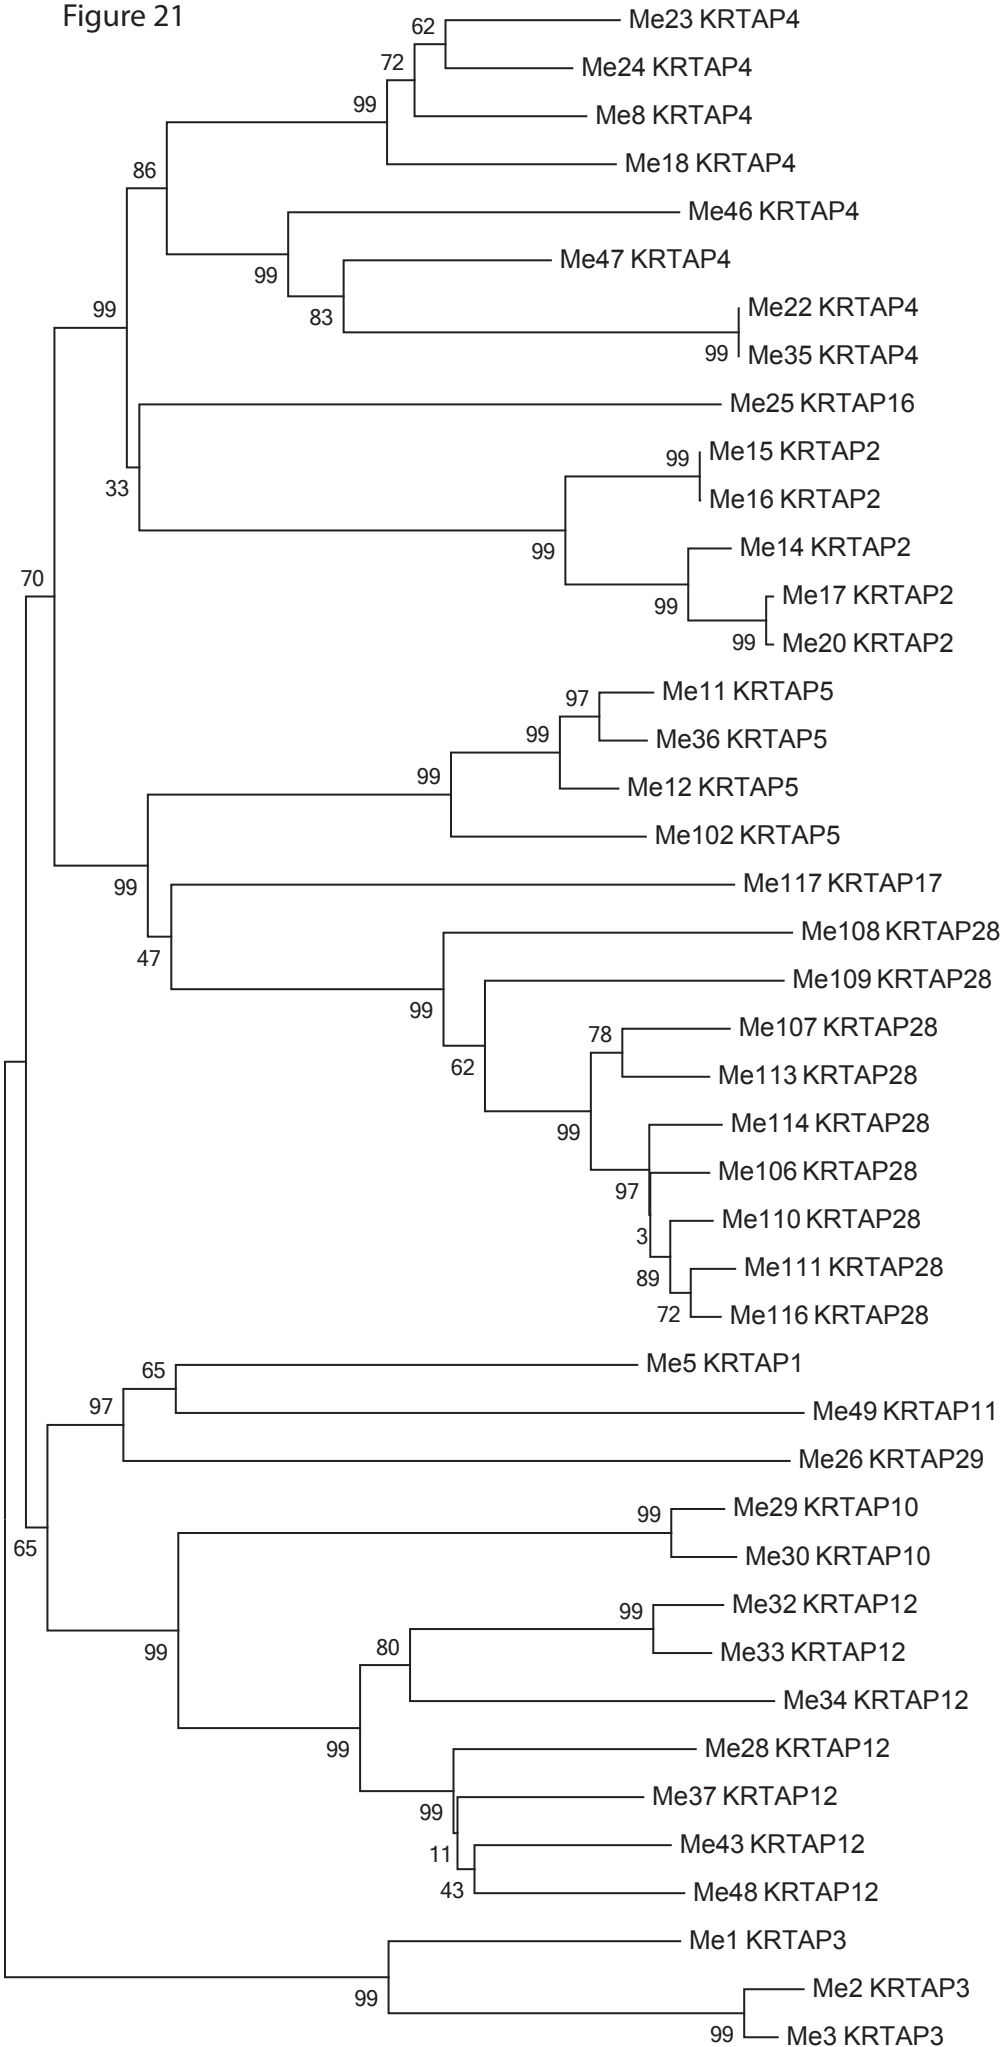

0.1

Figure 22

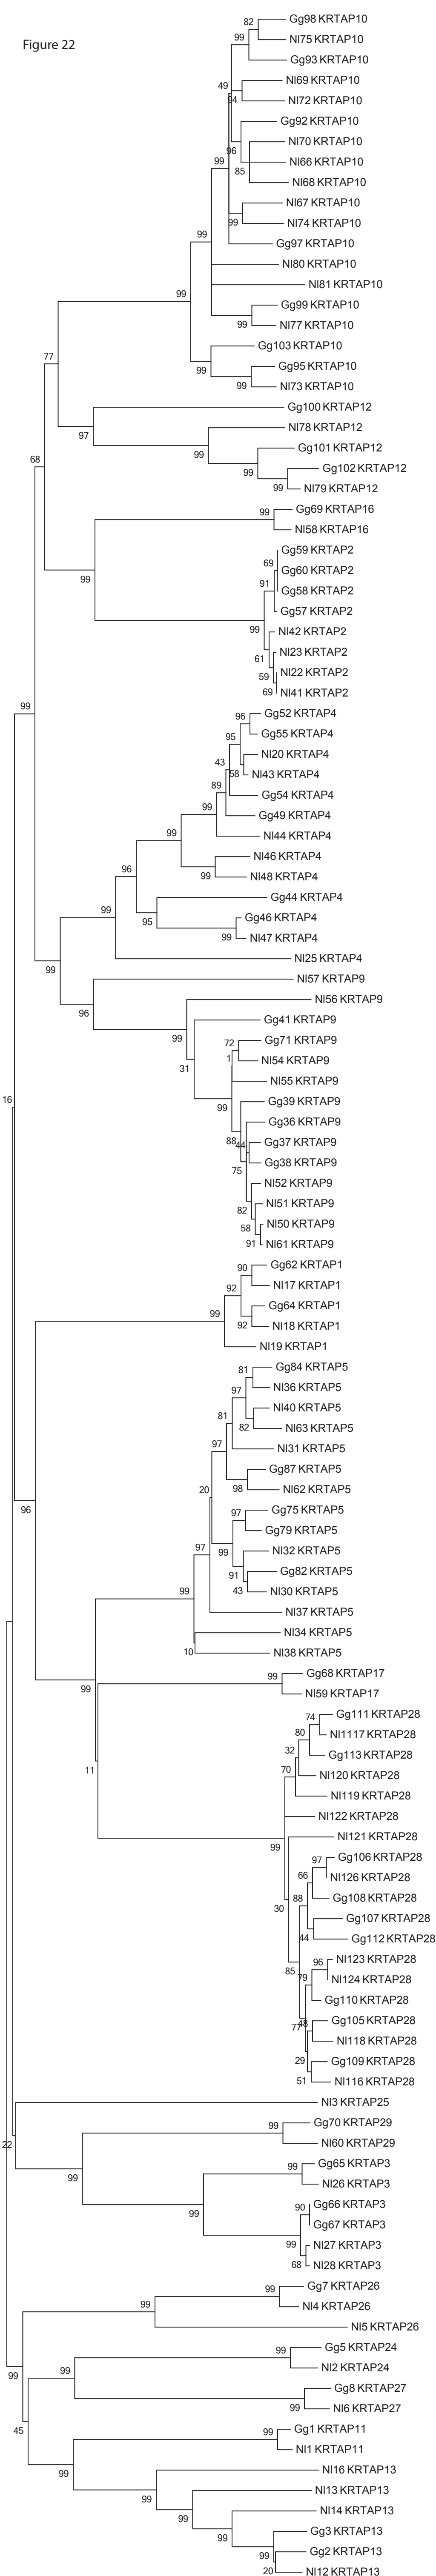

Figure 23

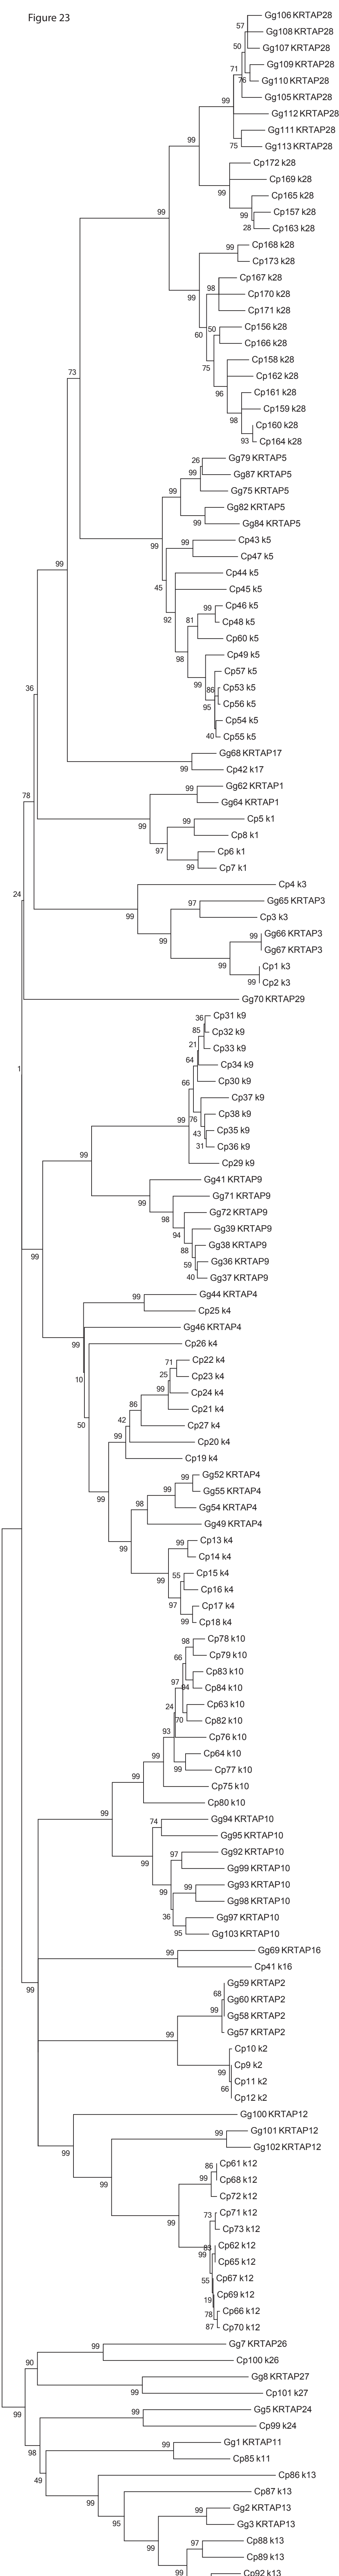

0.1



Figure 24

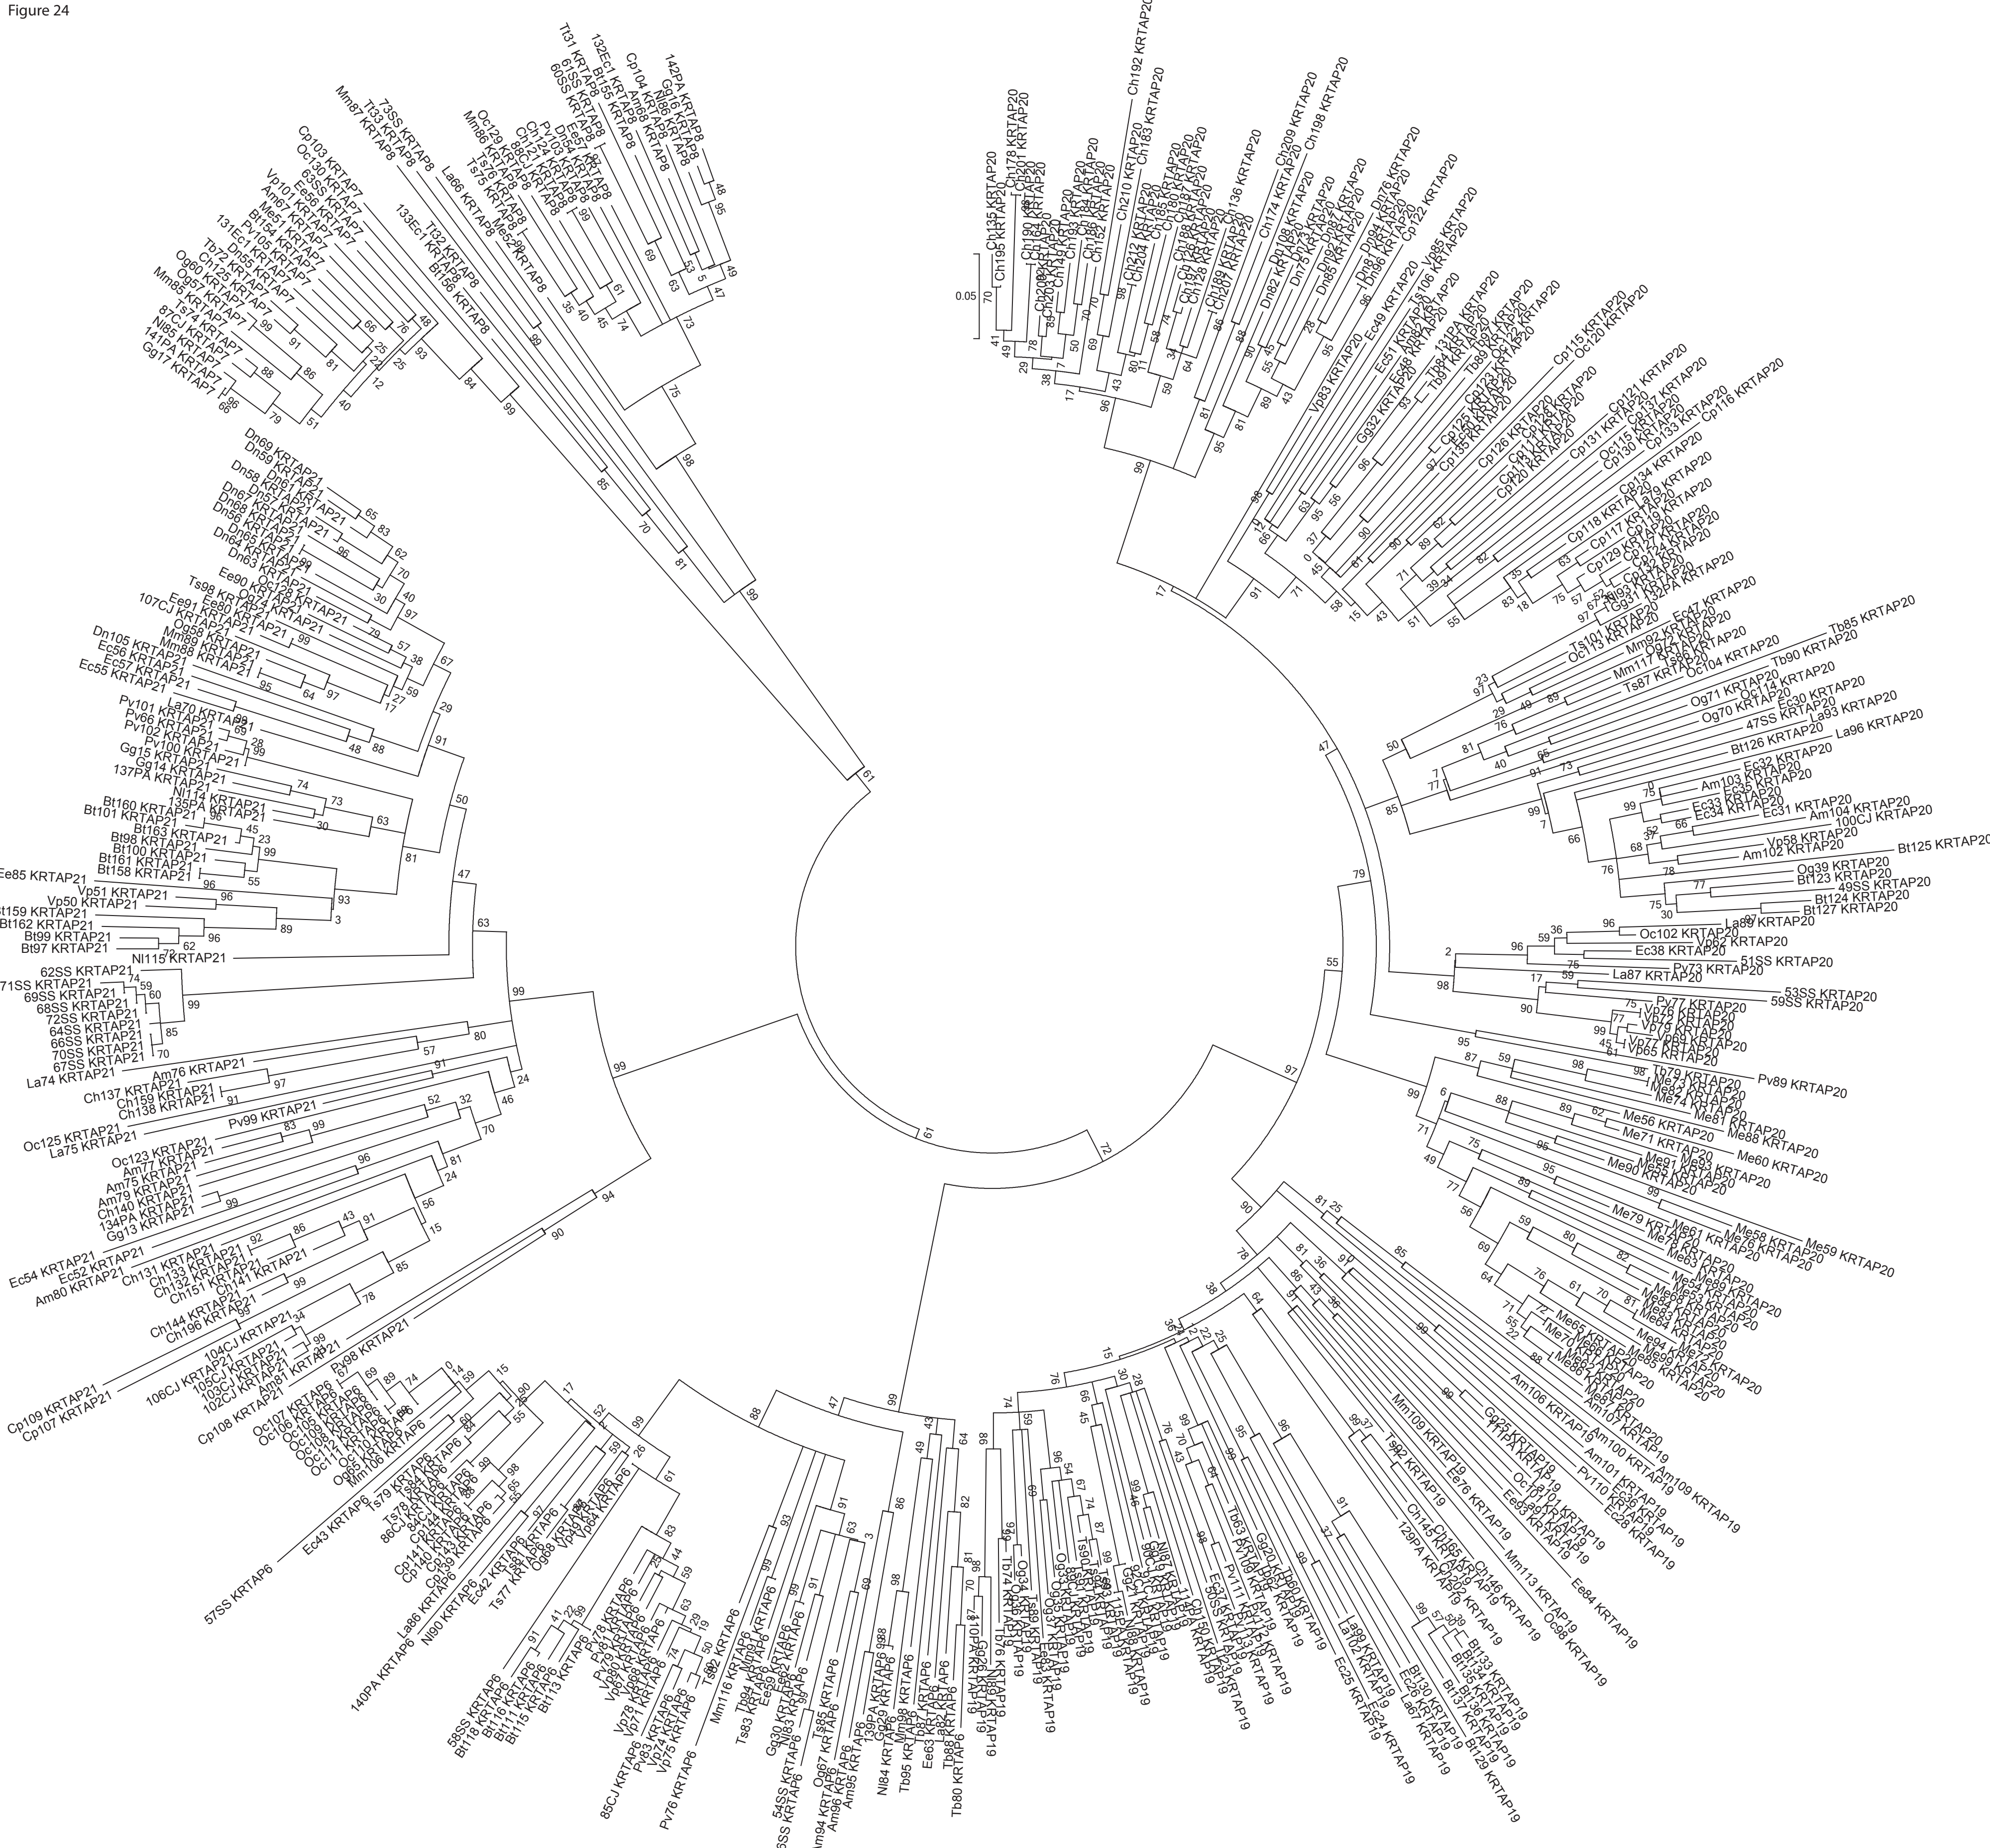

Supplement: 12864_2014_6484_MOESM1_ESM.pdf [file 12864_2014_6484_MOESM1_ESM.pdf]
